# Supplementary material for: Transcriptional profiling of Arabidopsis heat shock proteins and transcription factors reveals extensive overlap between heat and non-heat stress response pathways
Source: PubMed Central journal article supplement (PMC1887538; doi:10.1186/1471-2164-8-125), 2007-05-22
Supplement: 1471-2164-8-125-S2.pdf [file 1471-2164-8-125-S2.pdf]

## Additional File 2:

Transcriptional profiling of Arabidopsis heat shock proteins and transcription factors reveals extensive overlap between heat and non-heat stress response pathways

*William R. Swindell(1), Marianne Huebner(1), Andreas P. Weber(2)*

*(1) Michigan State University, Dept. of Statistics and Probability*

*(2) Michigan State University, Dept. of Plant Biology*

This file displays stress-response profile plots for each individual heat shock protein and transcription factor analyzed in this study. Expression response profiles are shown for all abiotic stress treatments applied to roots and shoots, and for the pathogen treatment applied to leaves. The horizontal axis of each plot corresponds to time (hours), while the vertical axis corresponds to the log<sub>2</sub> fold-change associated with a given stress treatment.

Contact: William R. Swindell, [swindel5@msu.edu](mailto:swindel5@msu.edu)

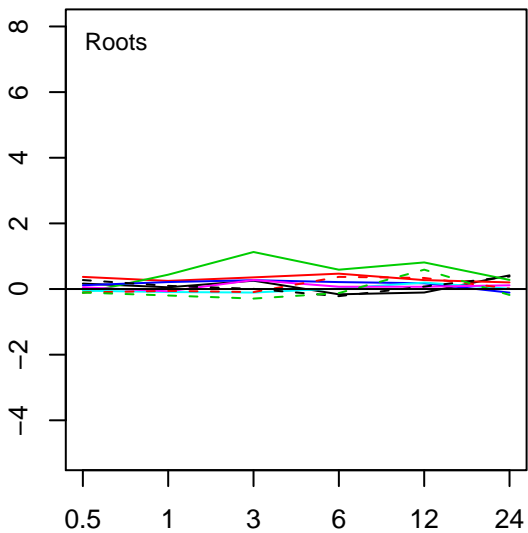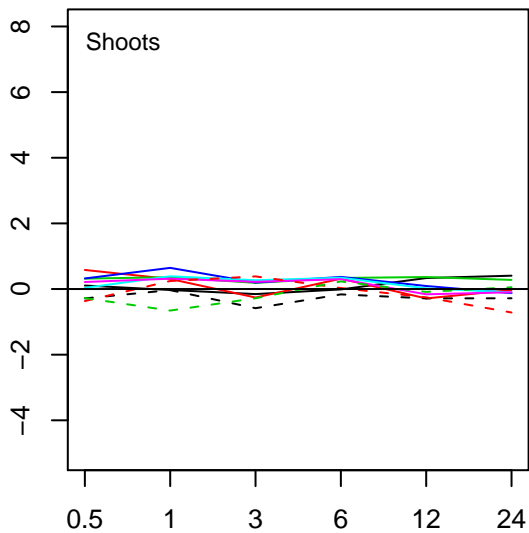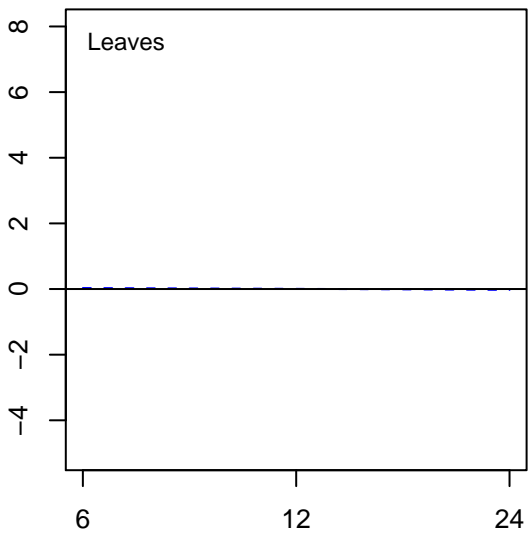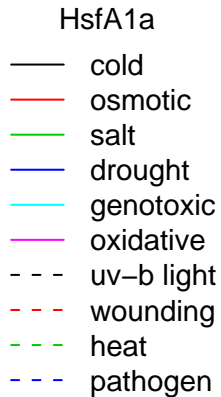

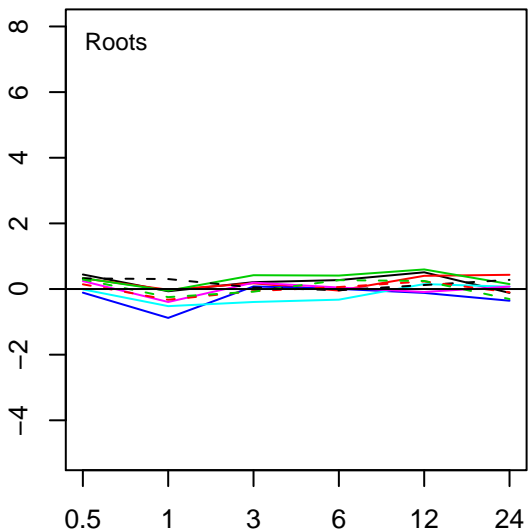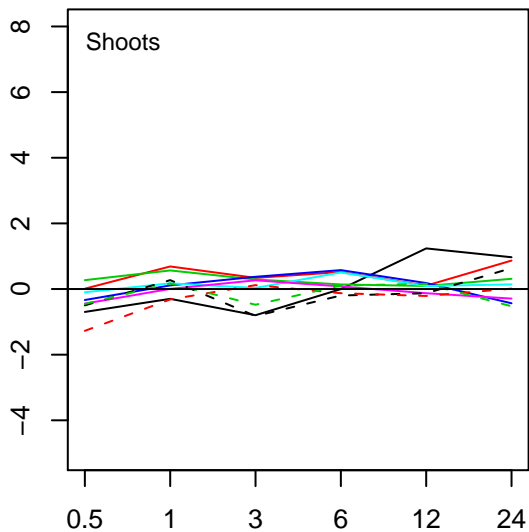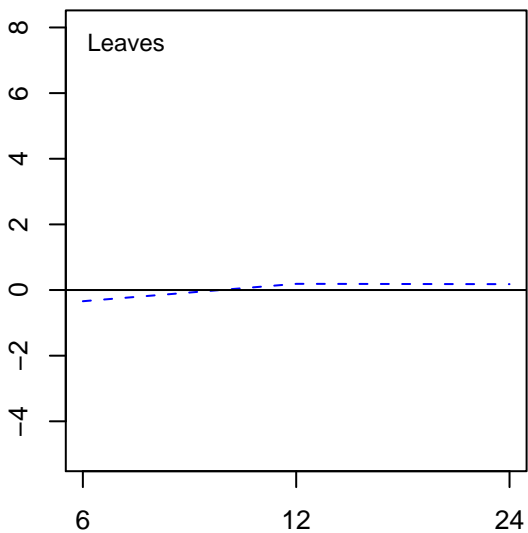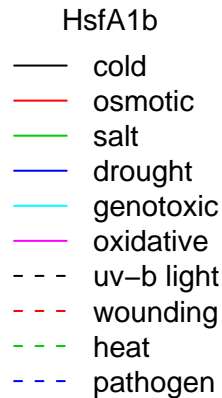

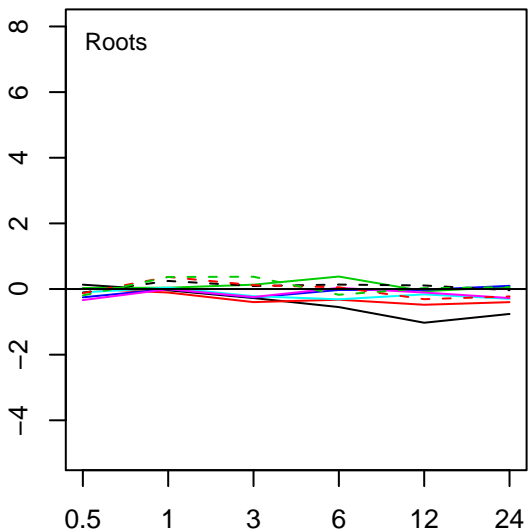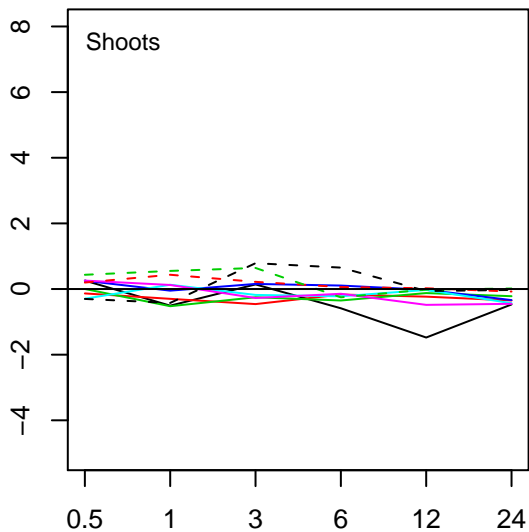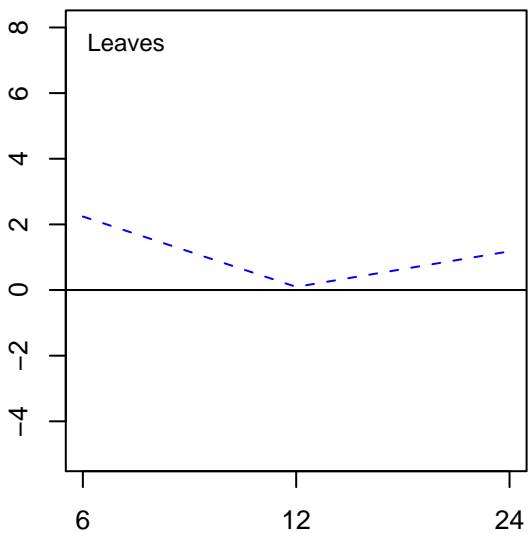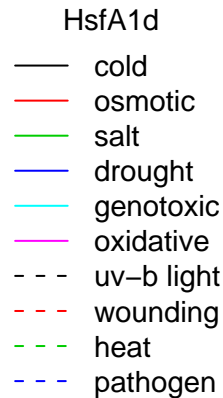

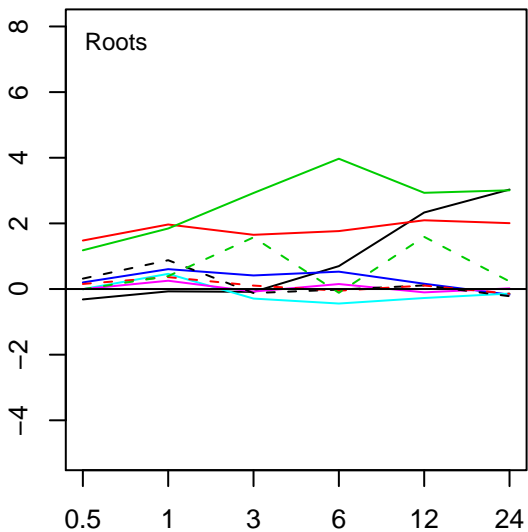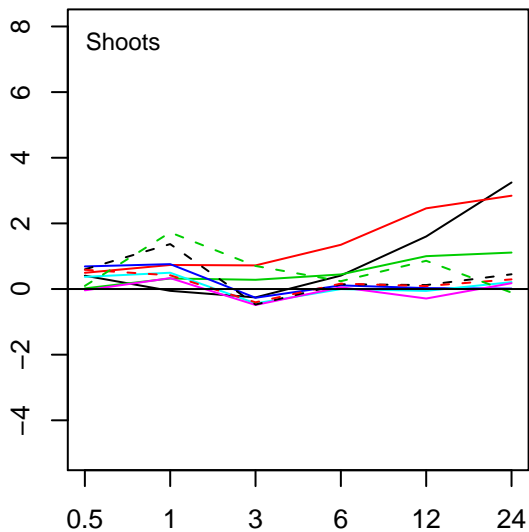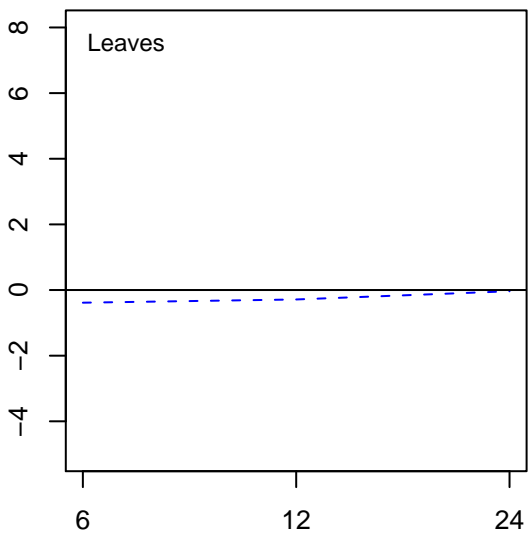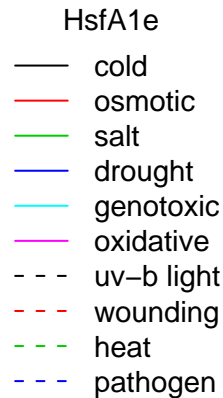

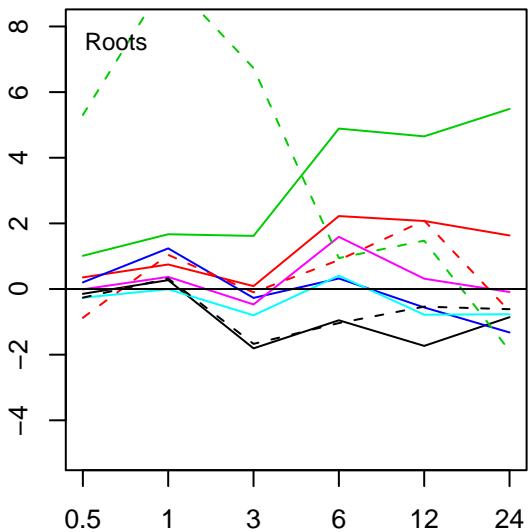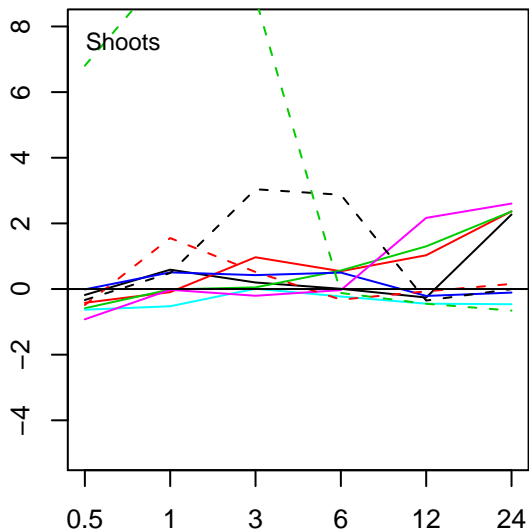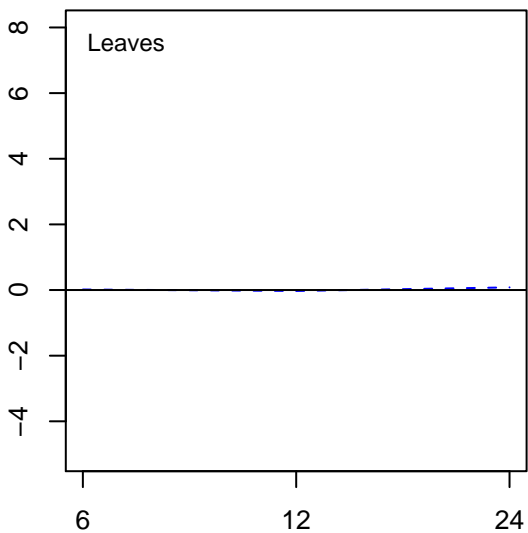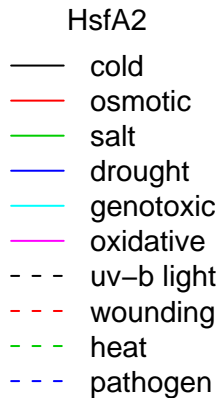

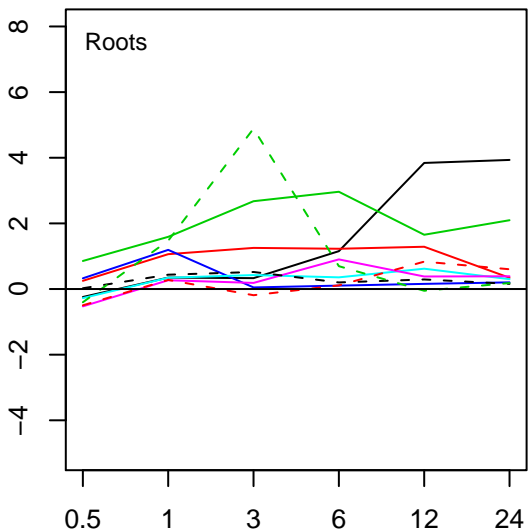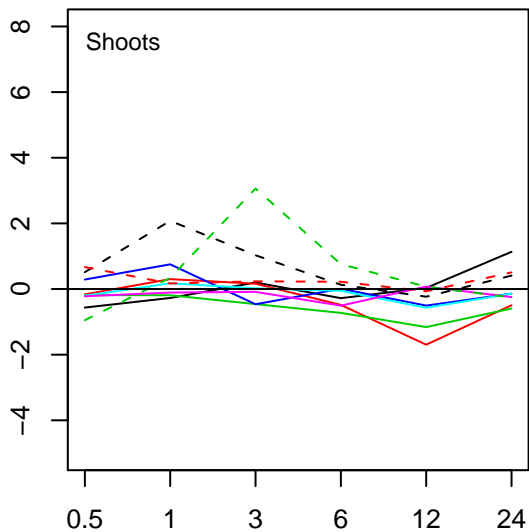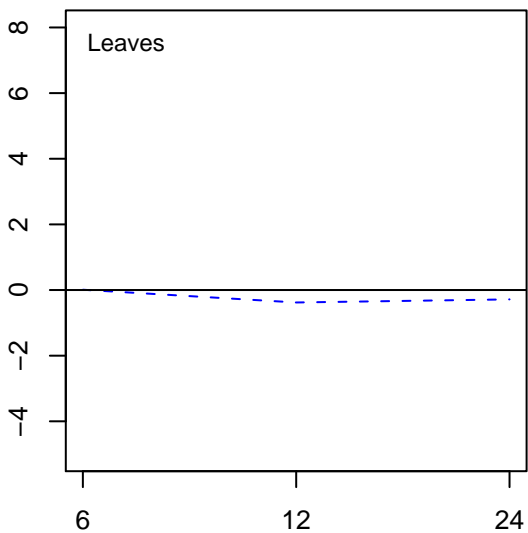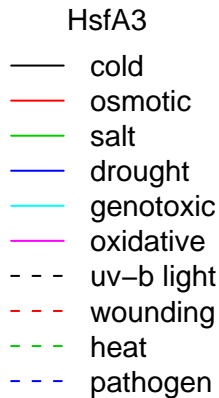

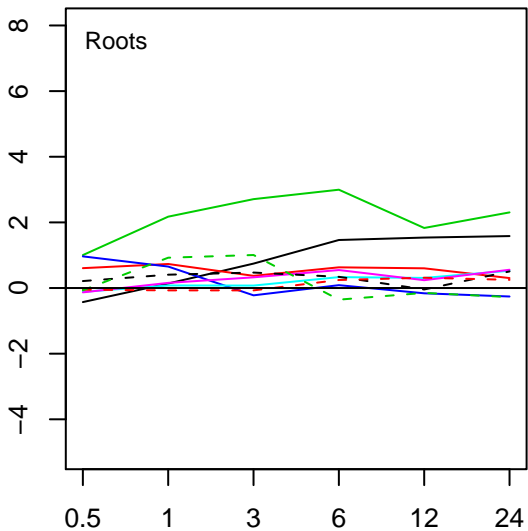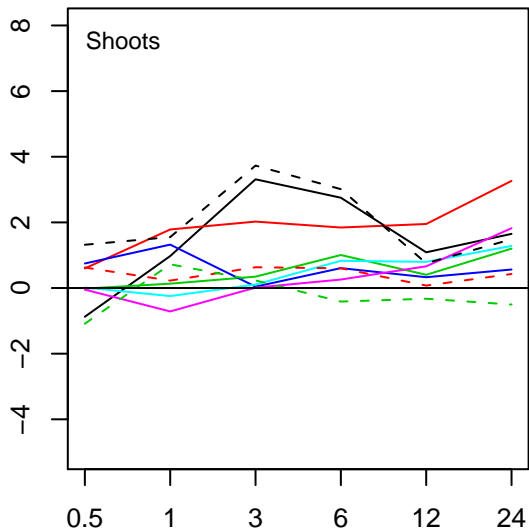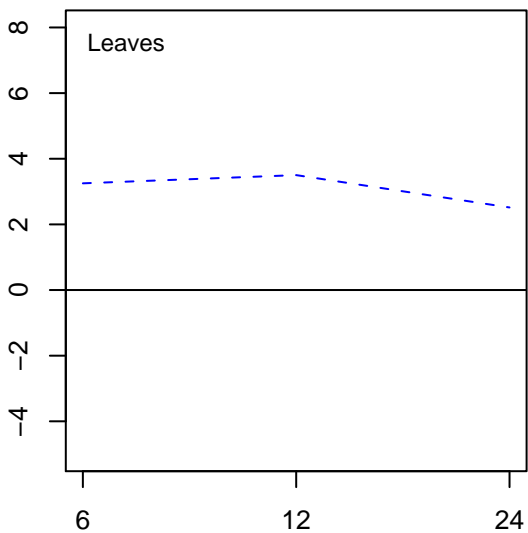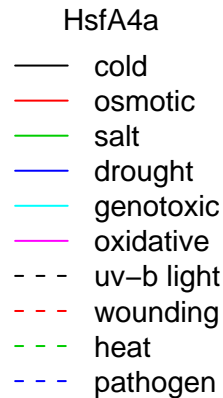



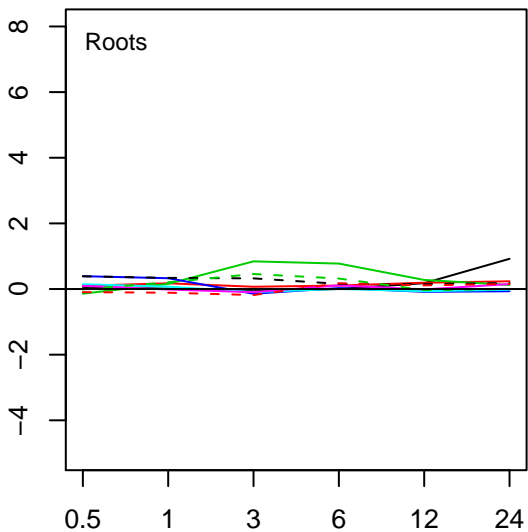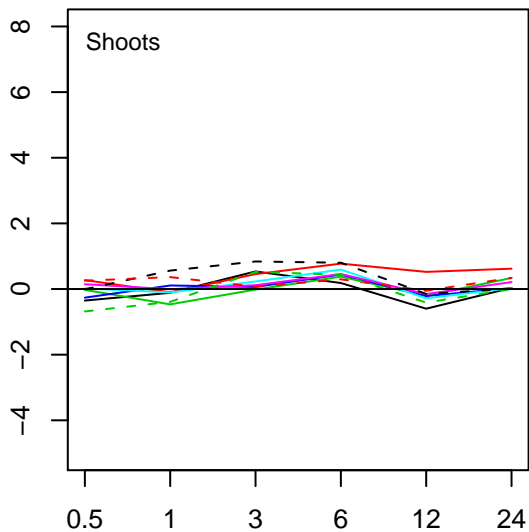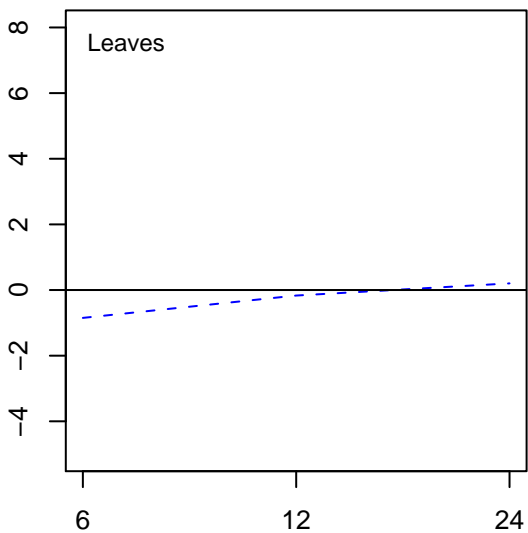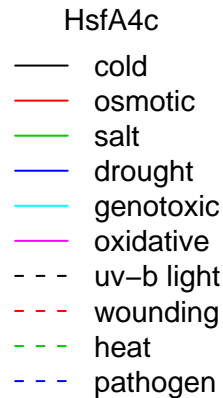

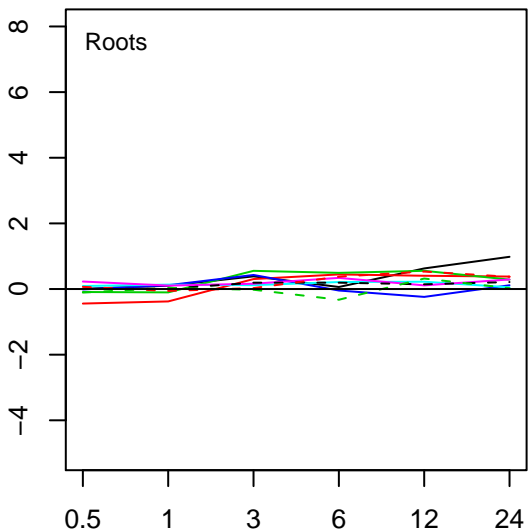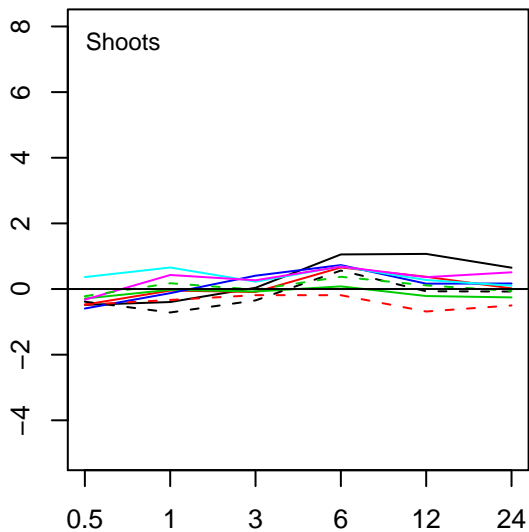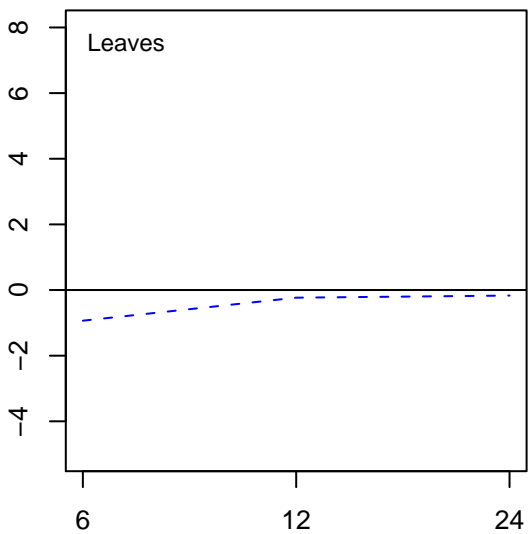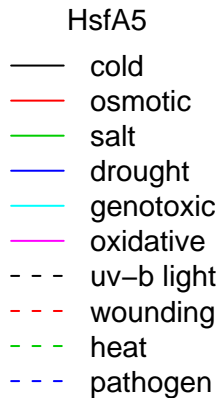

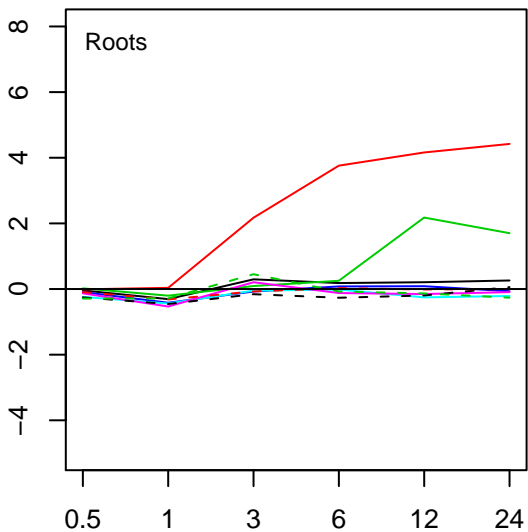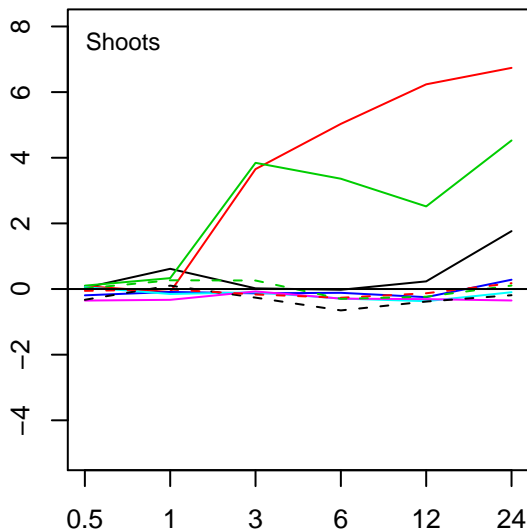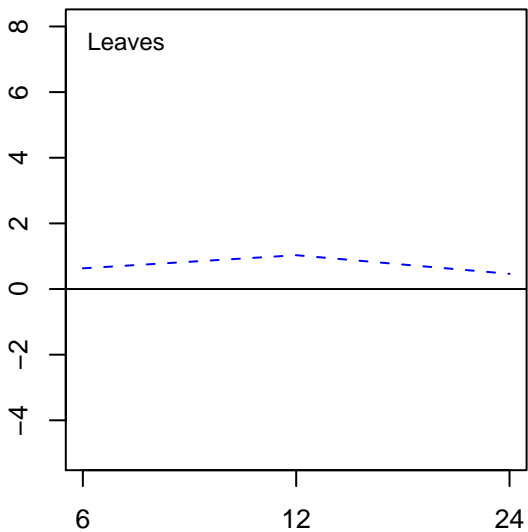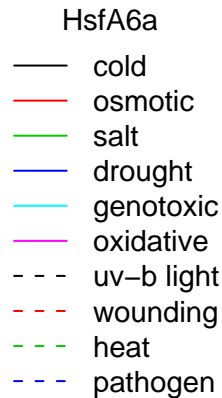

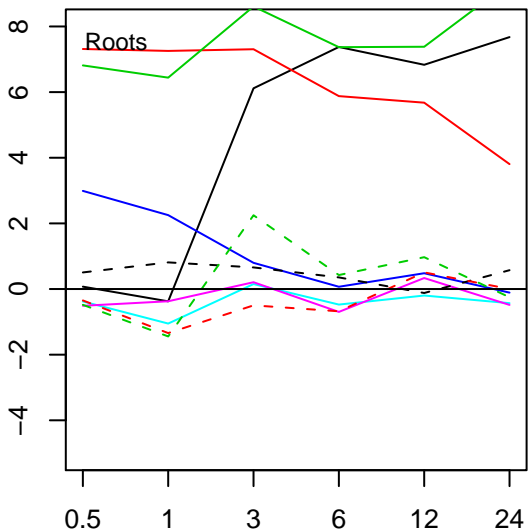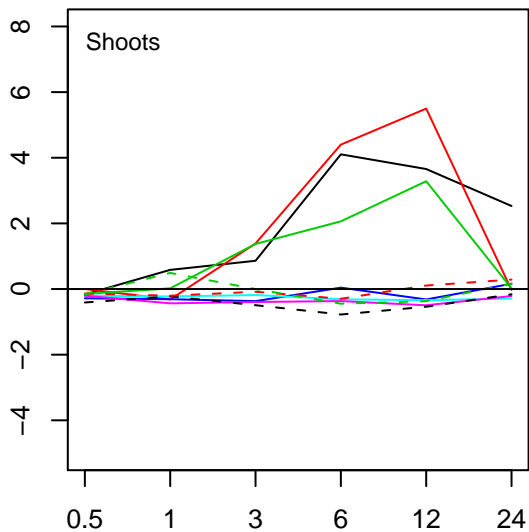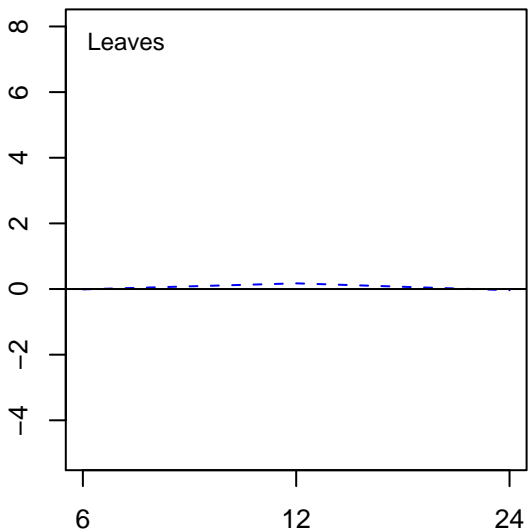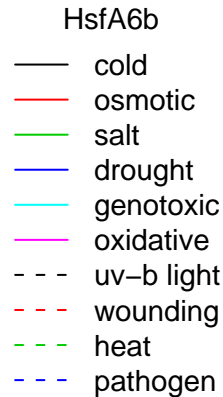

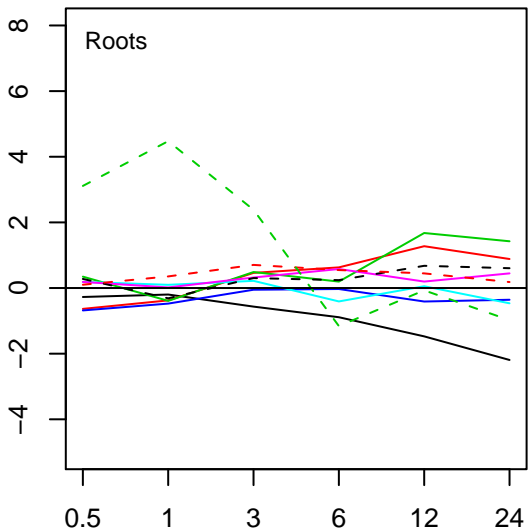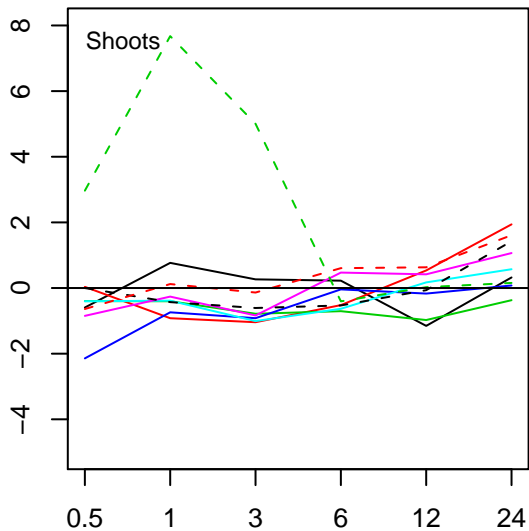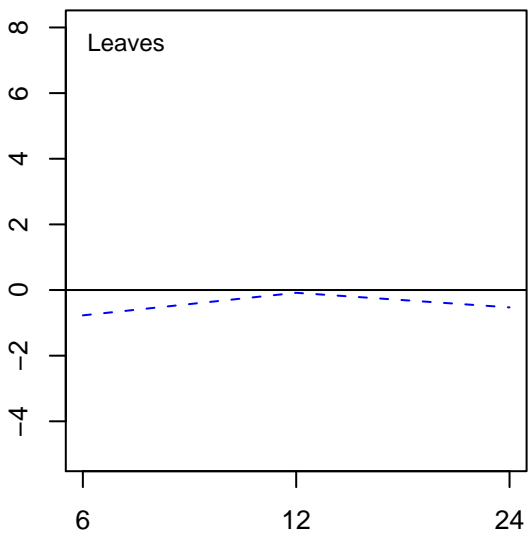

**HsfA7a**

- cold
- osmotic
- salt
- drought
- genotoxic
- oxidative
- - - uv-b light
- - - wounding
- - - heat
- - - pathogen

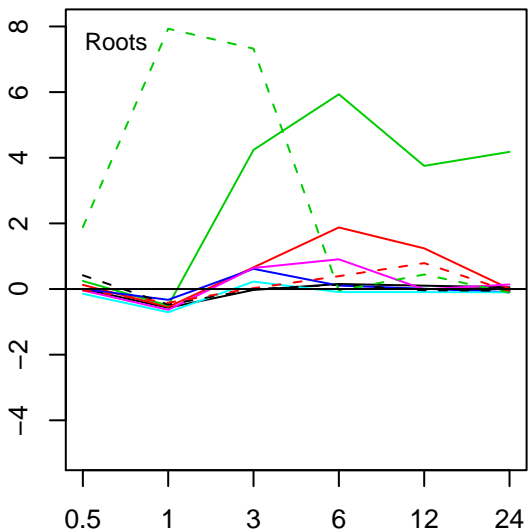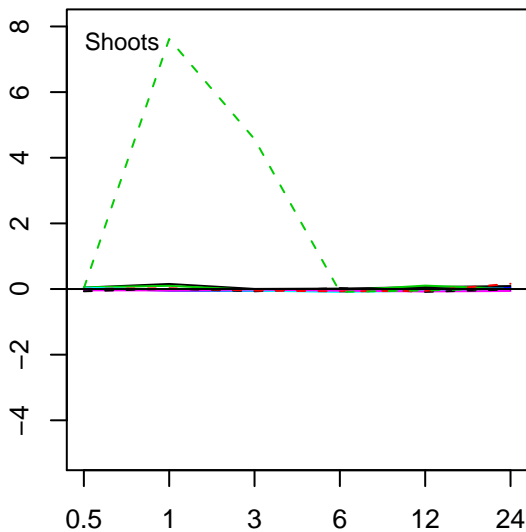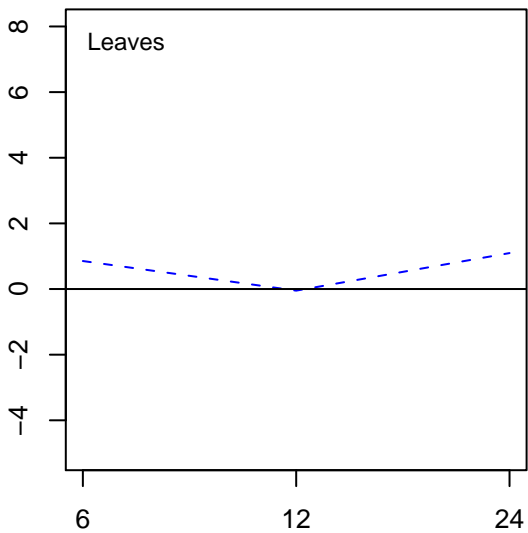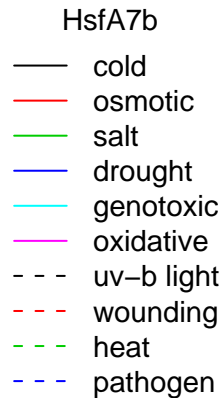

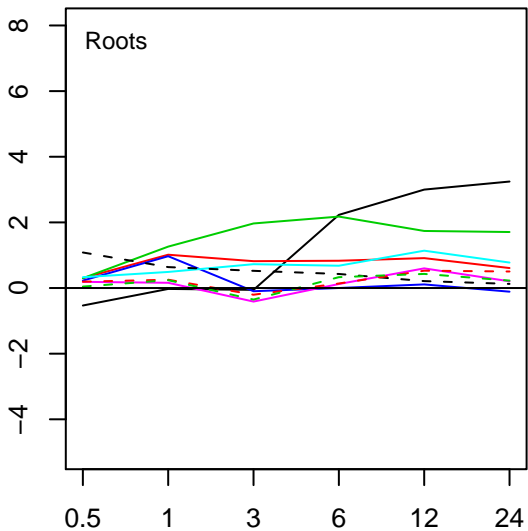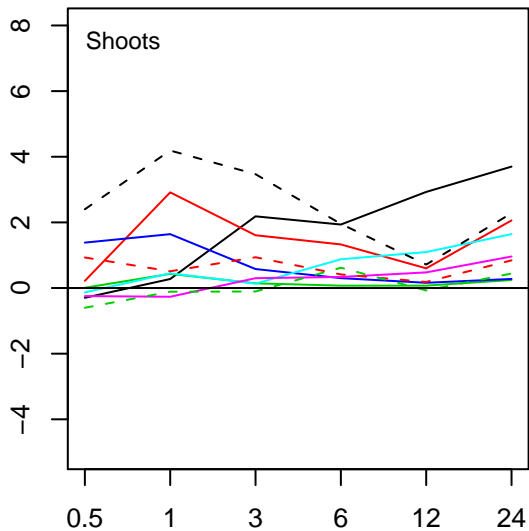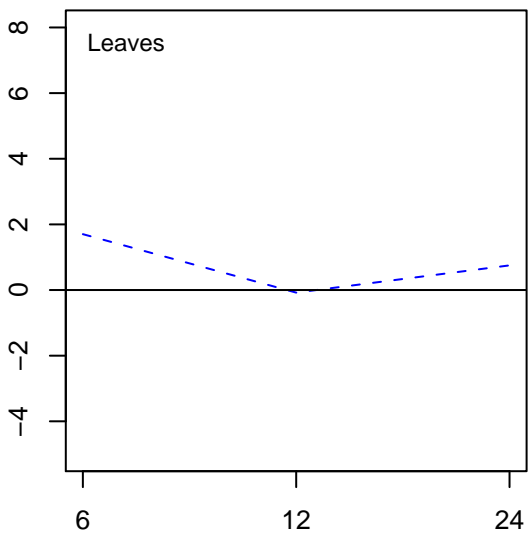

### HsfA8

- cold
- osmotic
- salt
- drought
- genotoxic
- oxidative
- - - uv-b light
- - - wounding
- - - heat
- - - pathogen

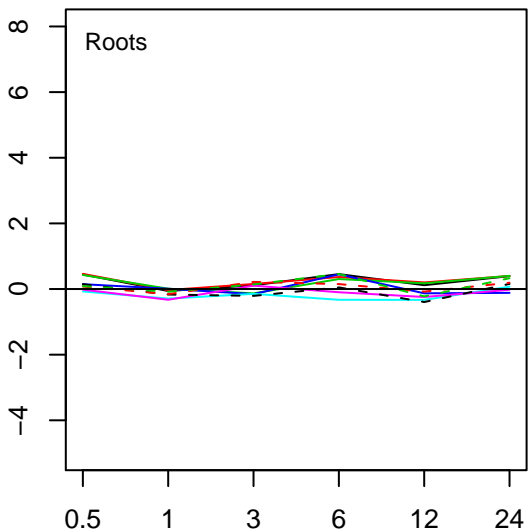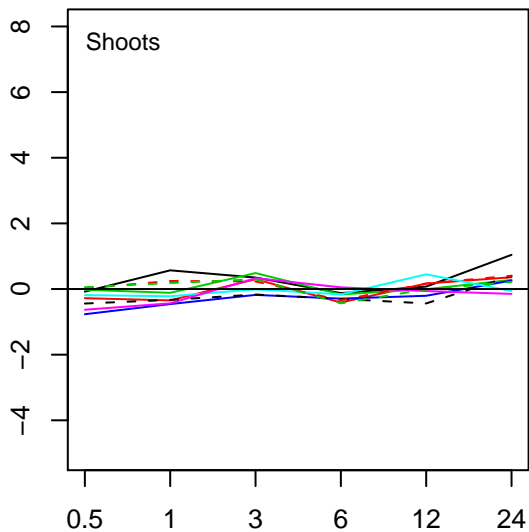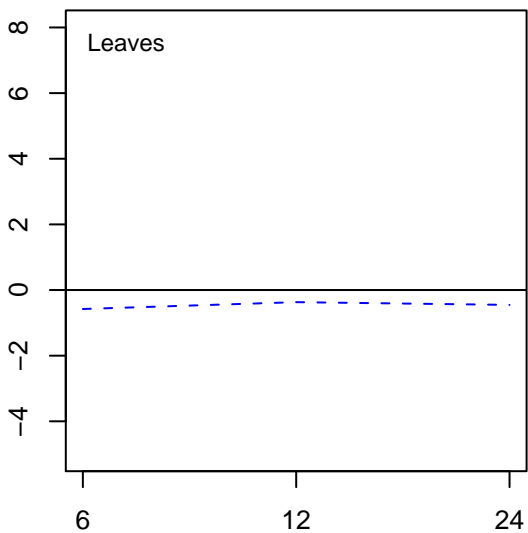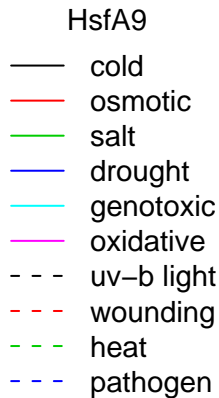



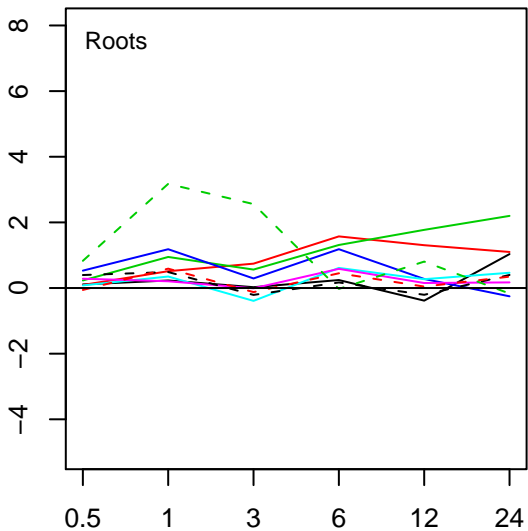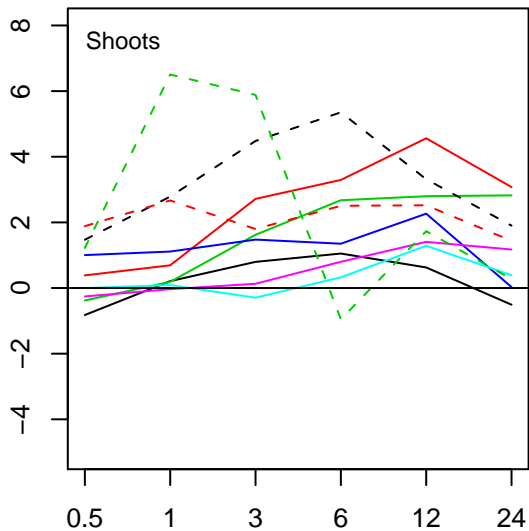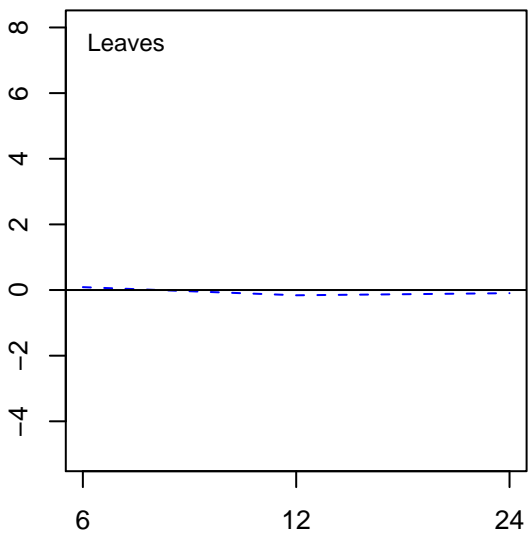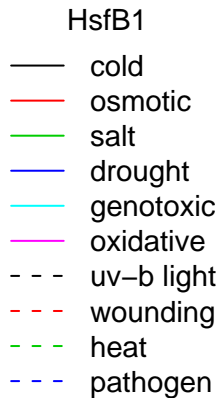

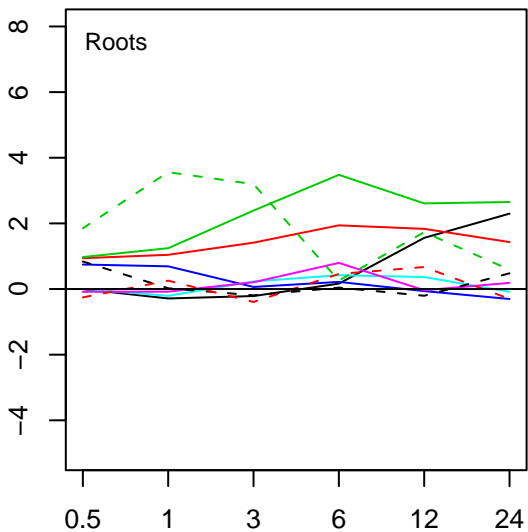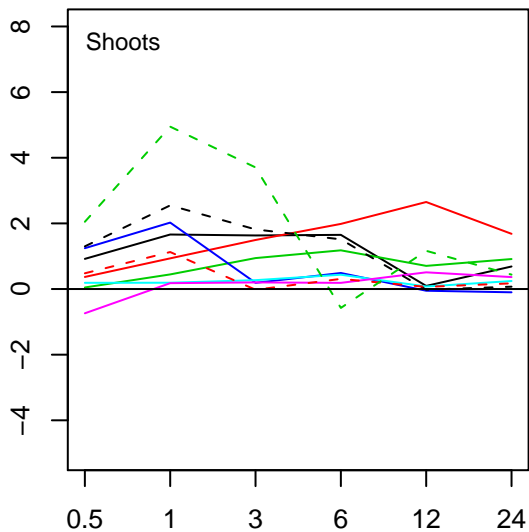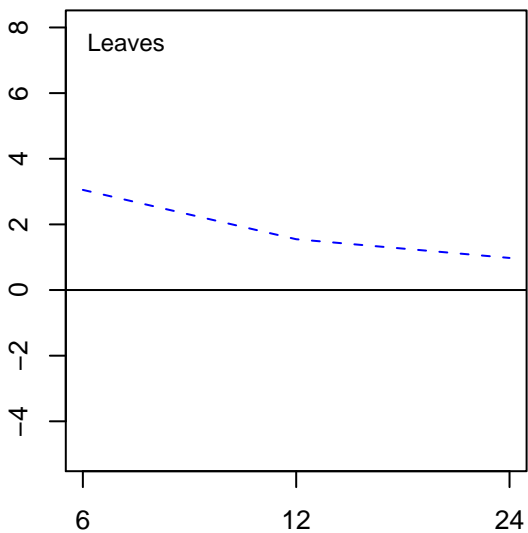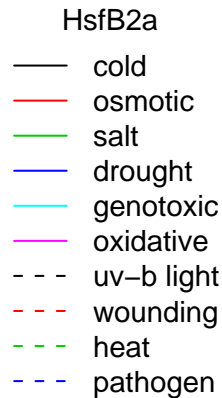

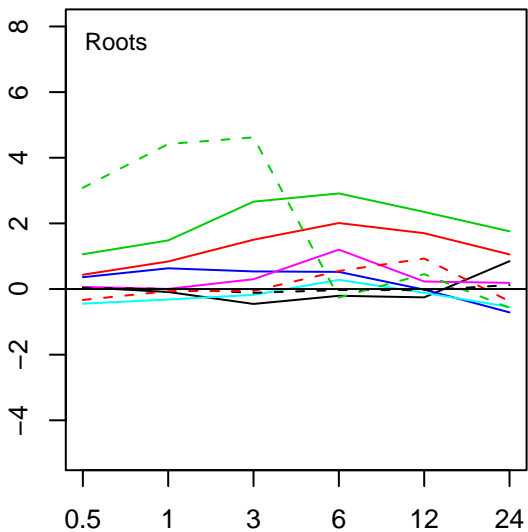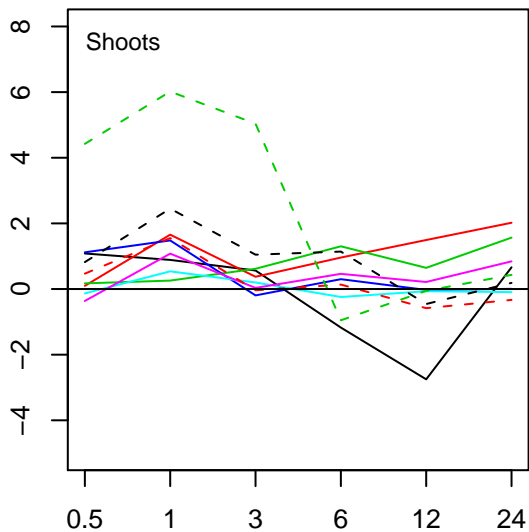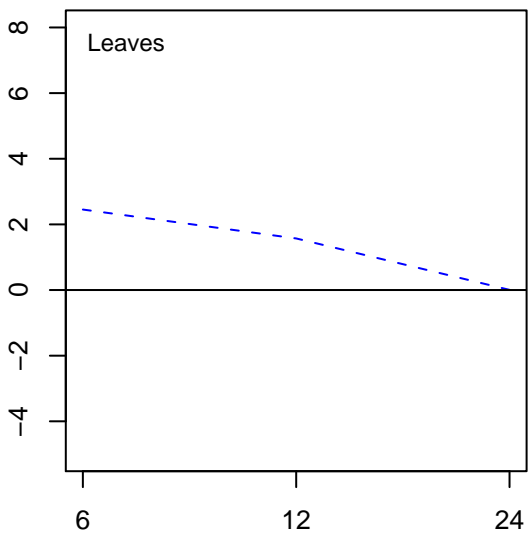

### HsfB2b

- cold
- osmotic
- salt
- drought
- genotoxic
- oxidative
- - - uv-b light
- - - wounding
- - - heat
- - - pathogen

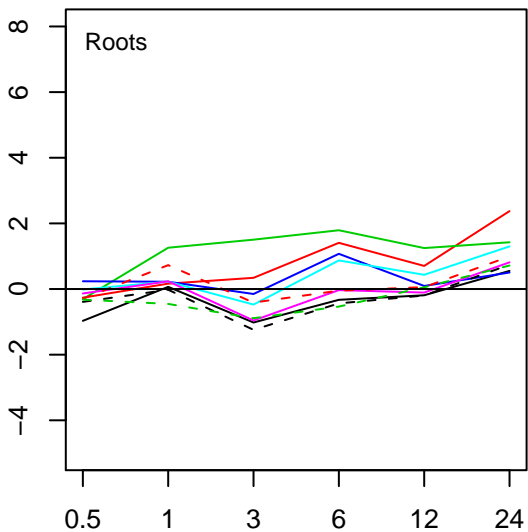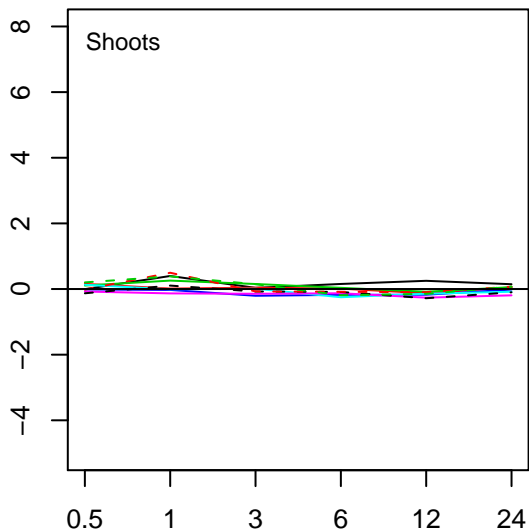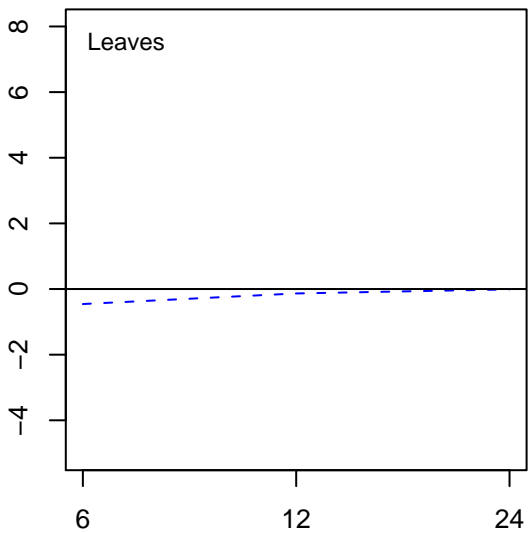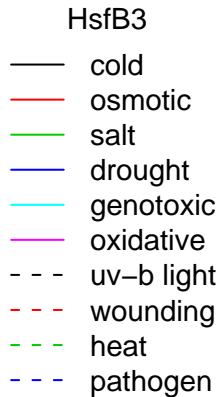

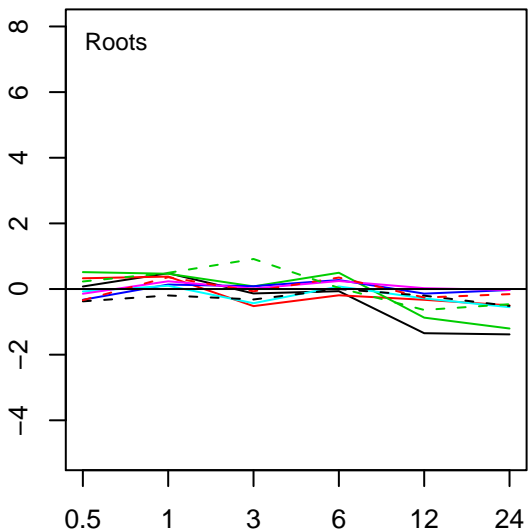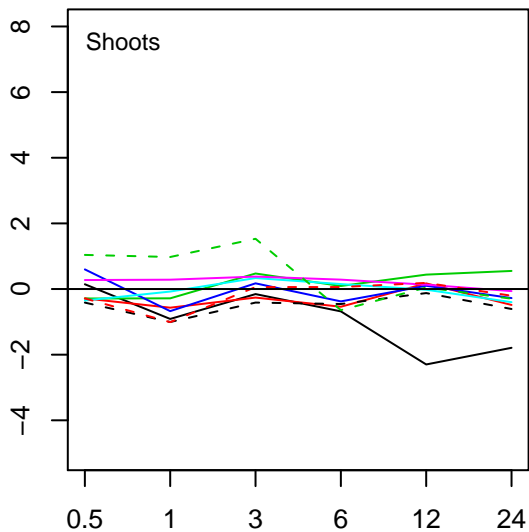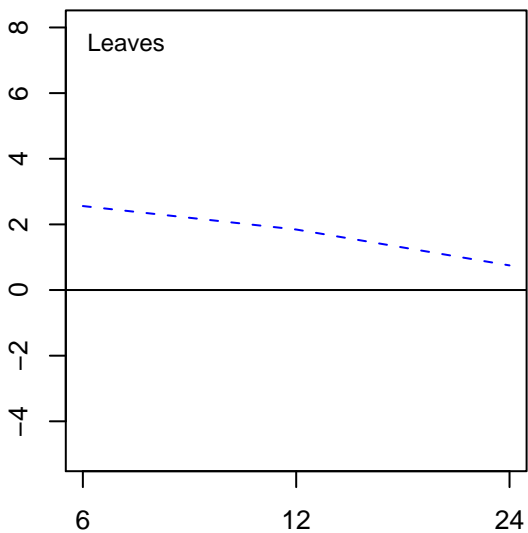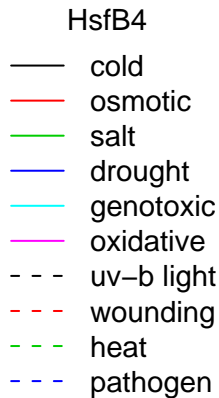

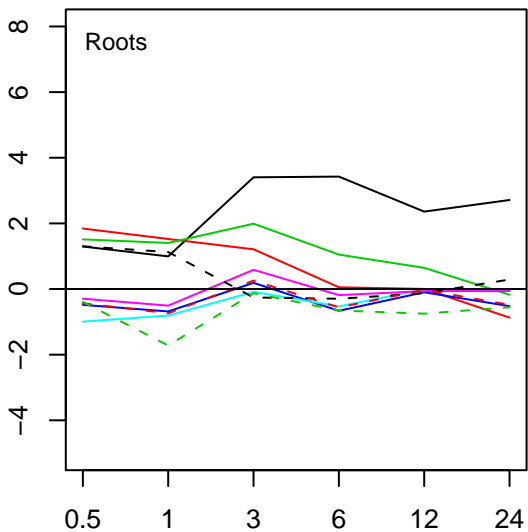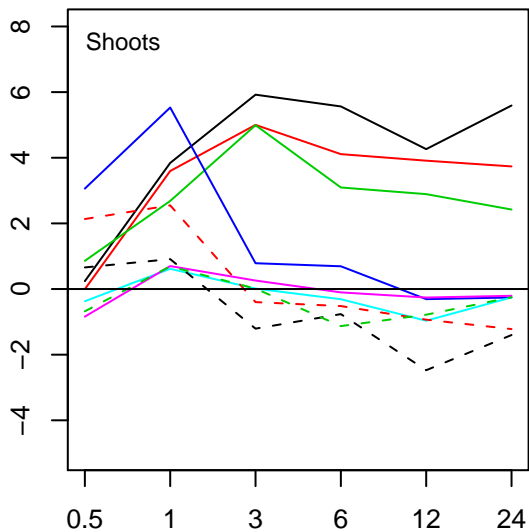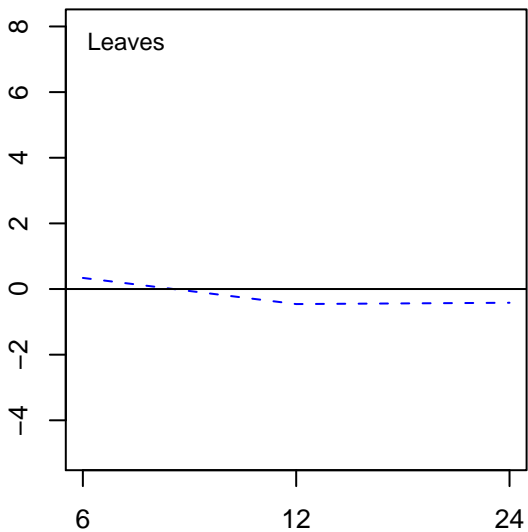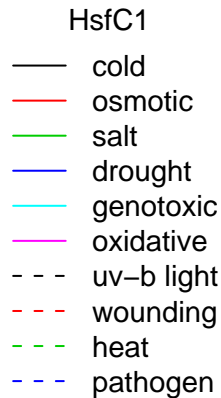

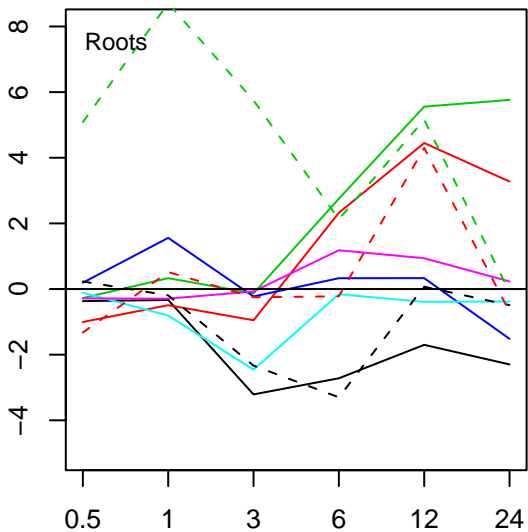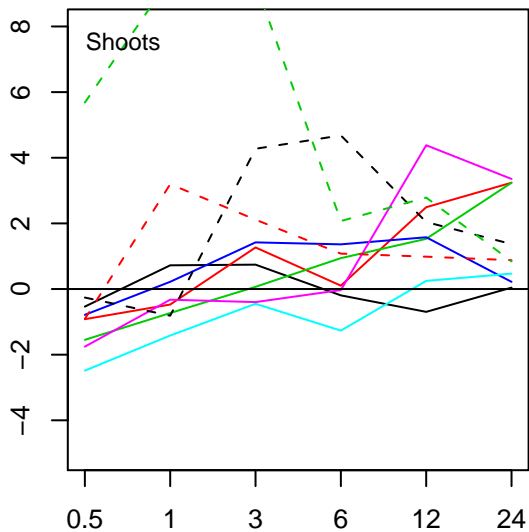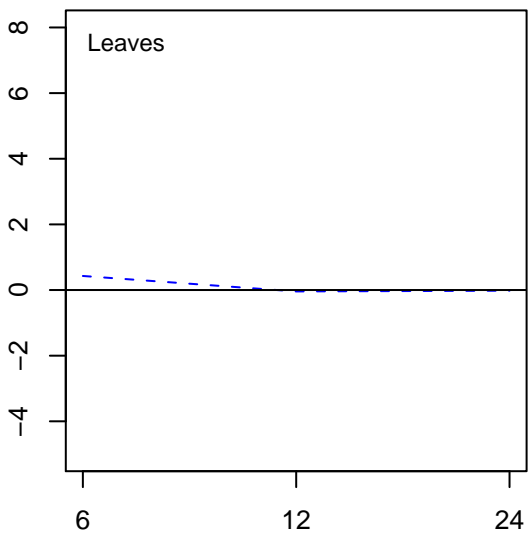

AtHsp17.6A-CI

- cold
- osmotic
- salt
- drought
- genotoxic
- oxidative
- - - uv-b light
- - - wounding
- - - heat
- - - pathogen

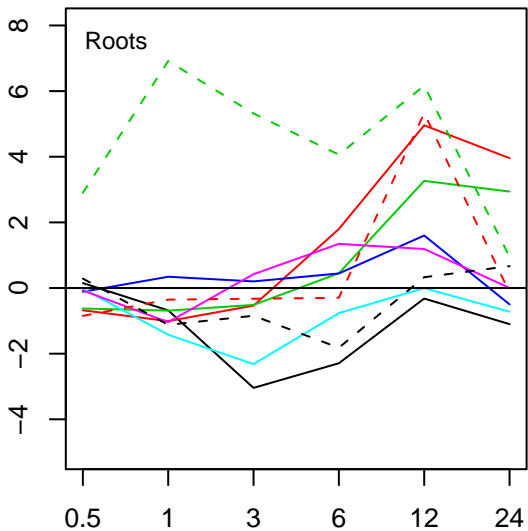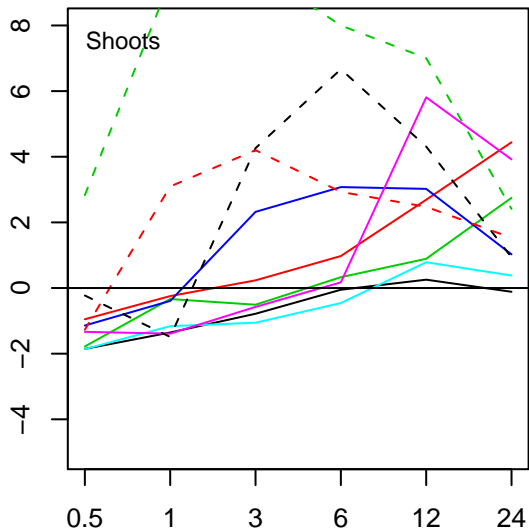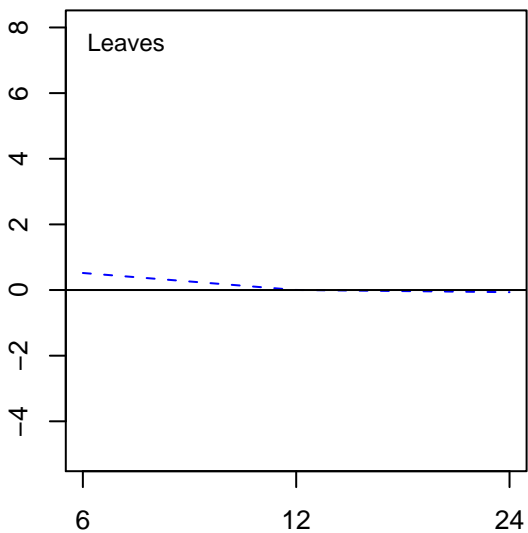

**AtHsp17.6B-CI**

- cold
- osmotic
- salt
- drought
- genotoxic
- oxidative
- - - uv-b light
- - - wounding
- - - heat
- - - pathogen



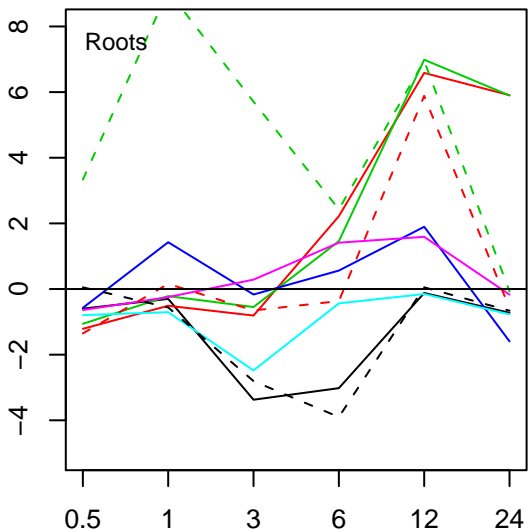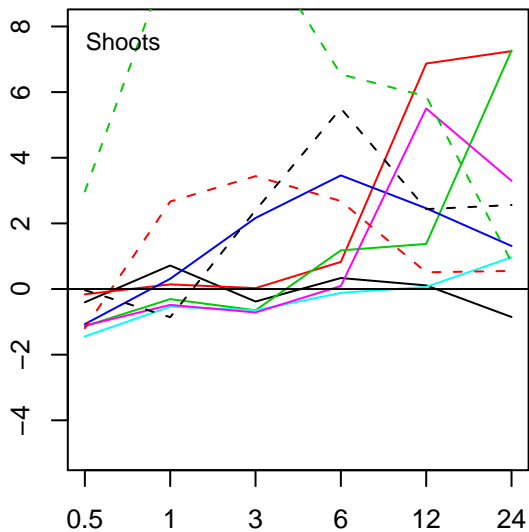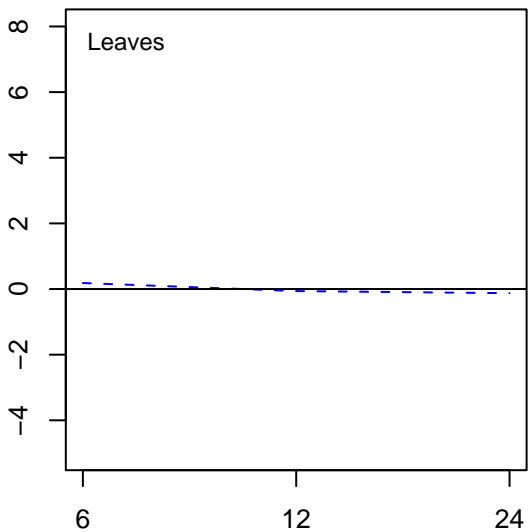

AtHsp17.4-CI

- cold
- osmotic
- salt
- drought
- genotoxic
- oxidative
- - - uv-b light
- - - wounding
- - - heat
- - - pathogen

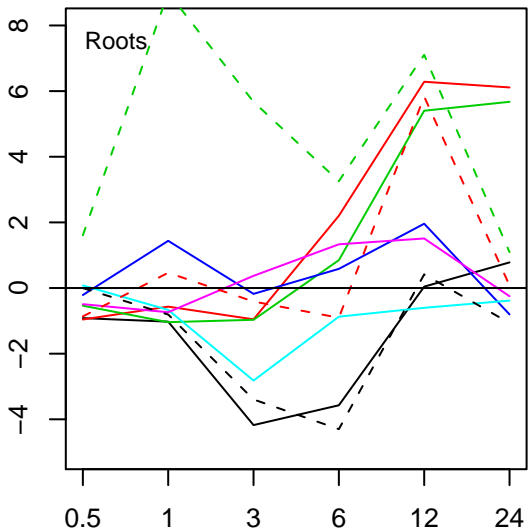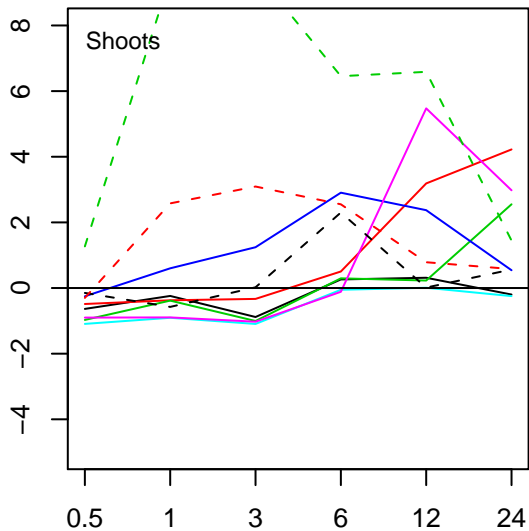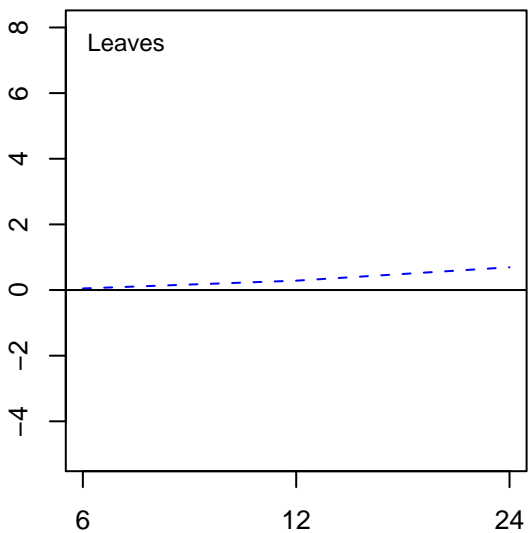

AtHsp17.6C-Cl

- cold
- osmotic
- salt
- drought
- genotoxic
- oxidative
- - - uv-b light
- - - wounding
- - - heat
- - - pathogen

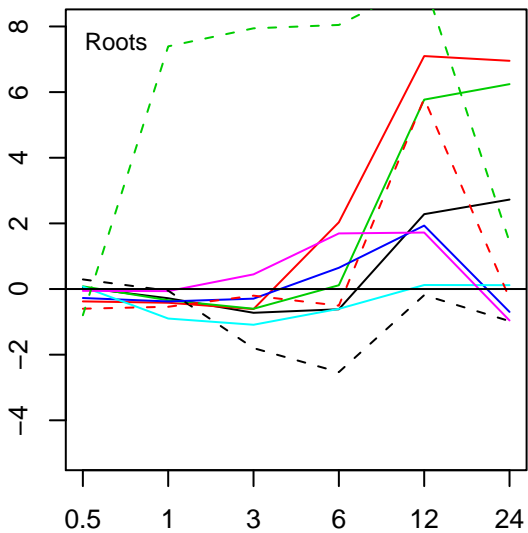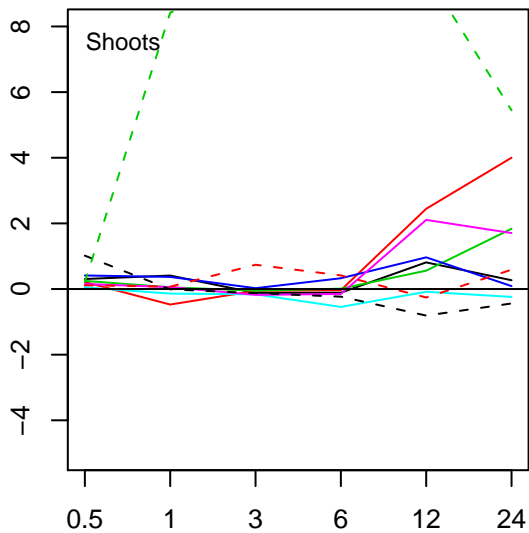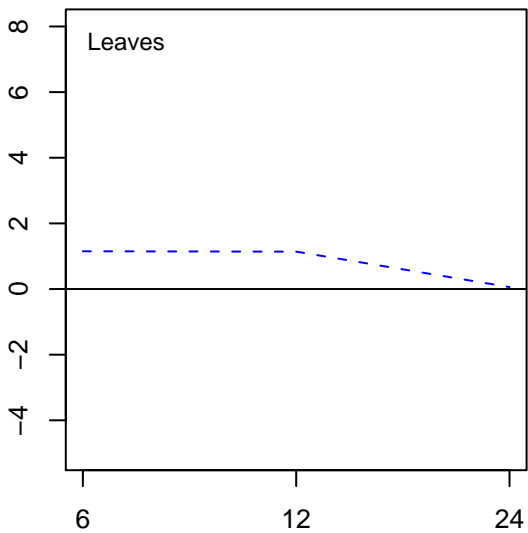

AtHsp18.1-CI

- cold
- osmotic
- salt
- drought
- genotoxic
- oxidative
- - - uv-b light
- - - wounding
- - - heat
- - - pathogen

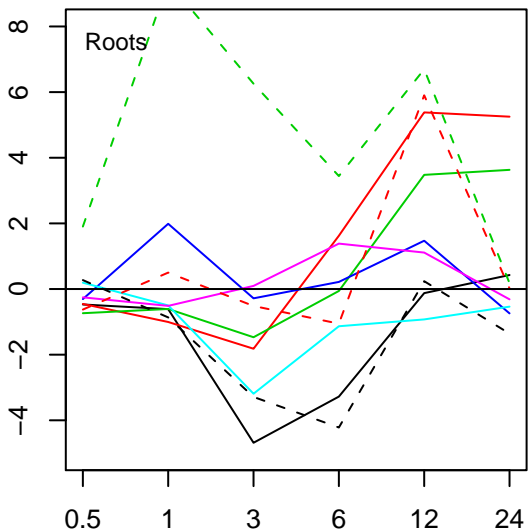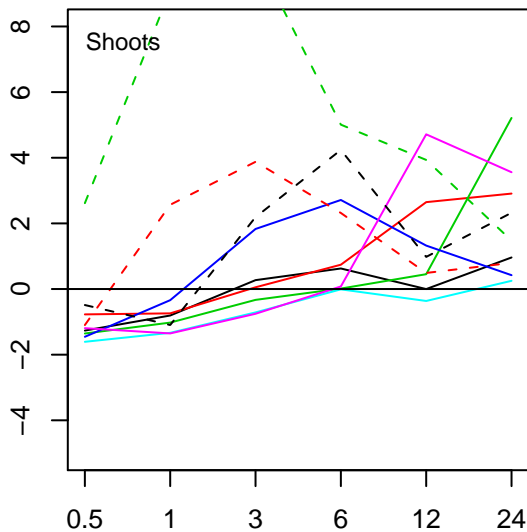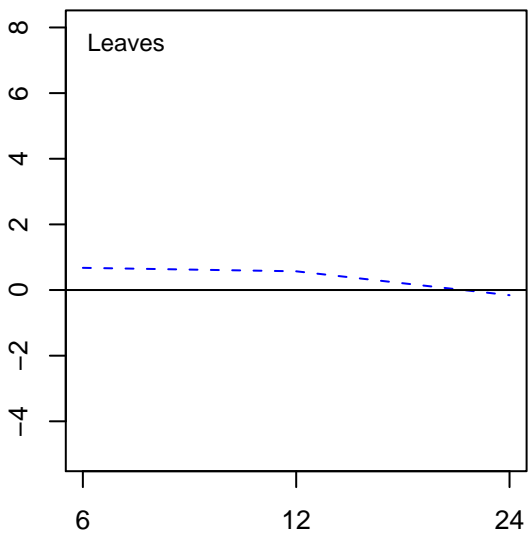

AtHsp17.6-CII

- cold
- osmotic
- salt
- drought
- genotoxic
- oxidative
- - - uv-b light
- - - wounding
- - - heat
- - - pathogen

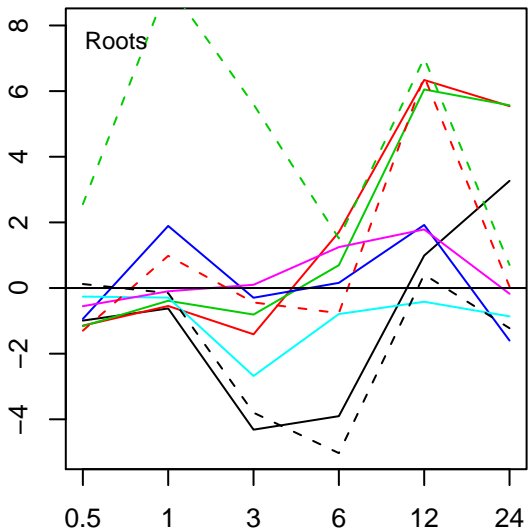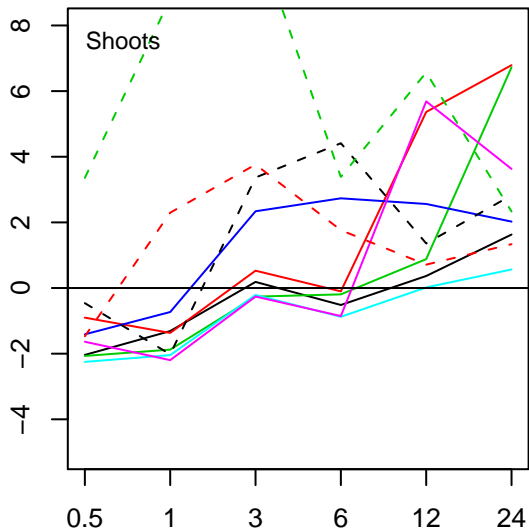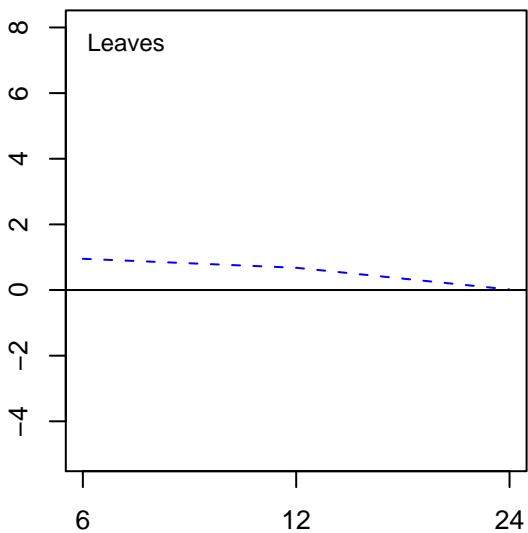

AtHsp17.7-CII

- cold
- osmotic
- salt
- drought
- genotoxic
- oxidative
- - - uv-b light
- - - wounding
- - - heat
- - - pathogen

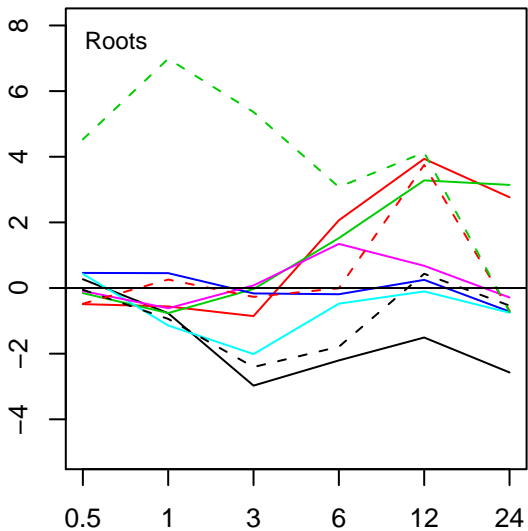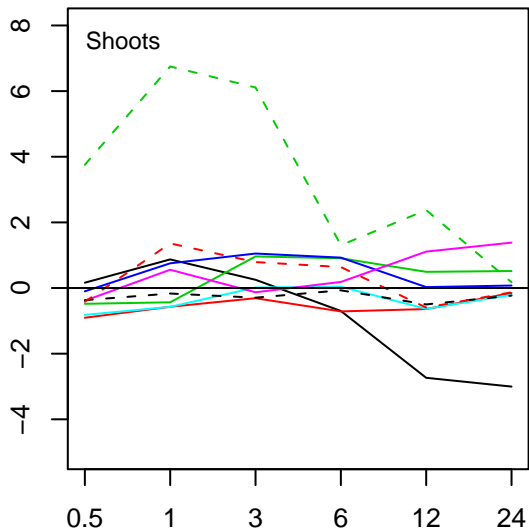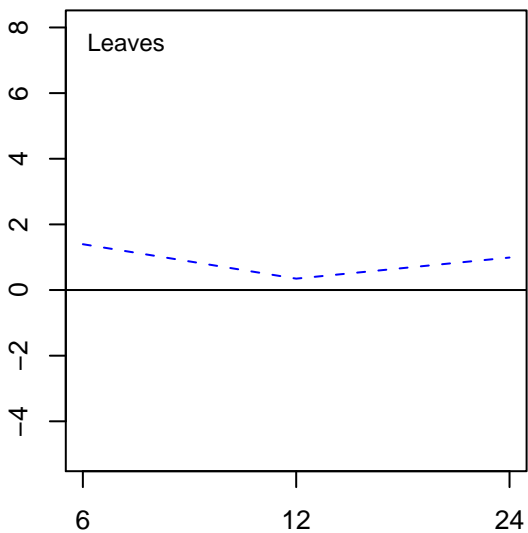

#### AtHsp17.4-CIII

- cold
- osmotic
- salt
- drought
- genotoxic
- oxidative
- - - uv-b light
- - - wounding
- - - heat
- - - pathogen

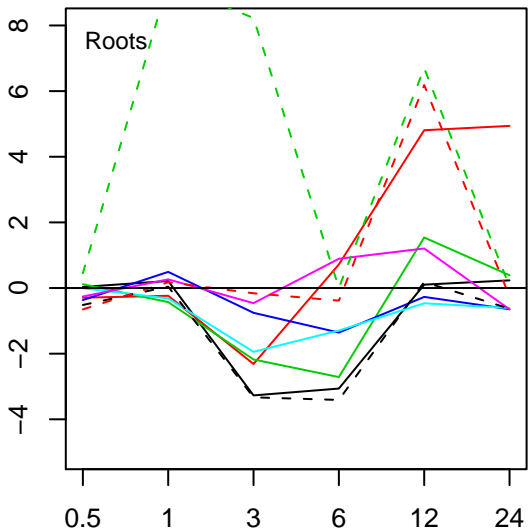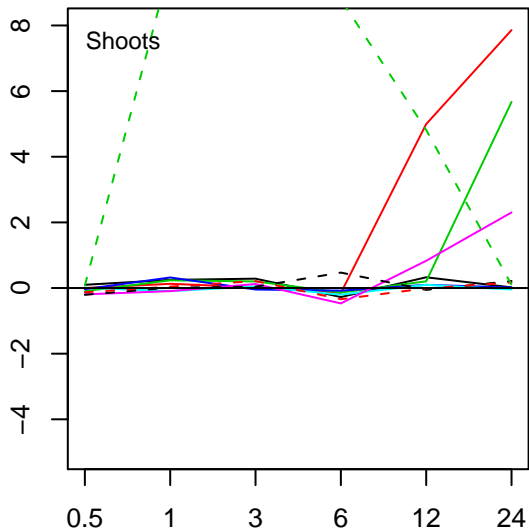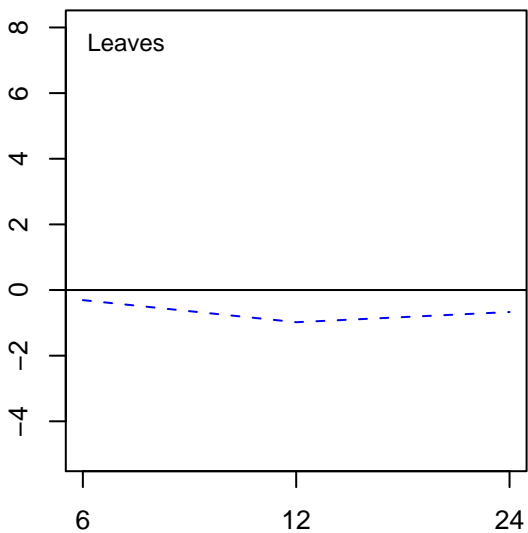

AtHsp25.4-P

- cold
- osmotic
- salt
- drought
- genotoxic
- oxidative
- - - uv-b light
- - - wounding
- - - heat
- - - pathogen

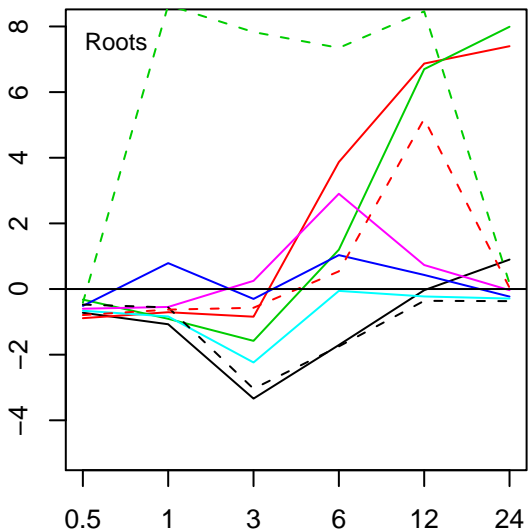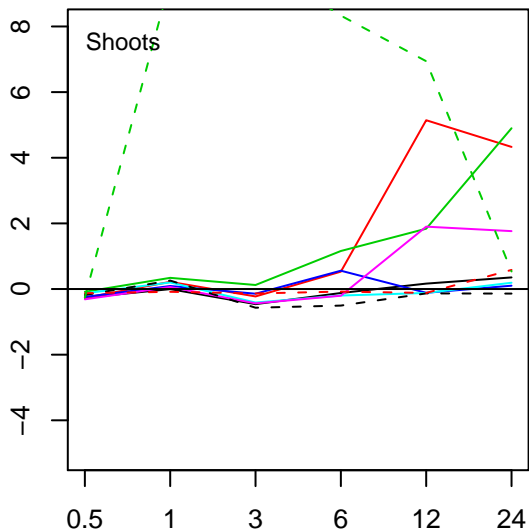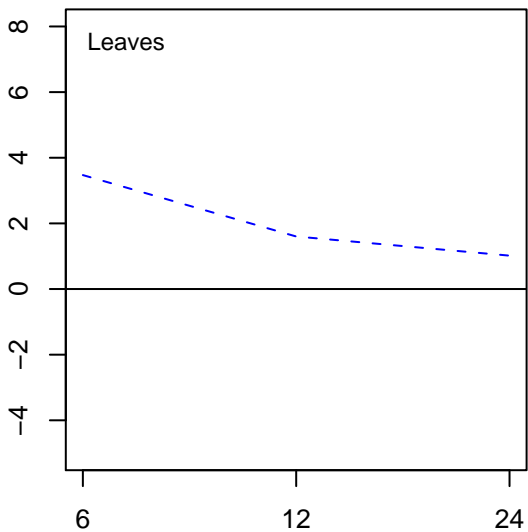

AtHsp22.0-ER

- cold
- osmotic
- salt
- drought
- genotoxic
- oxidative
- - - uv-b light
- - - wounding
- - - heat
- - - pathogen



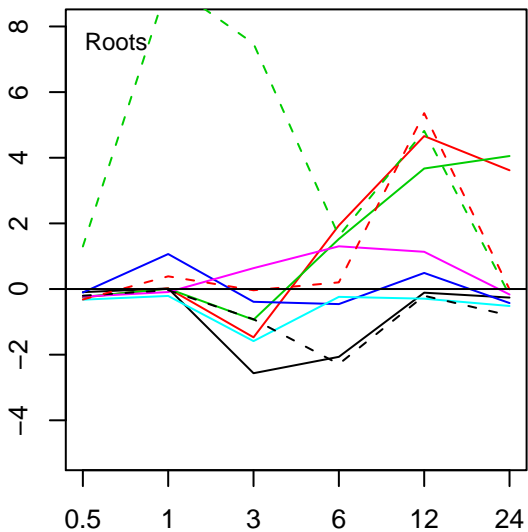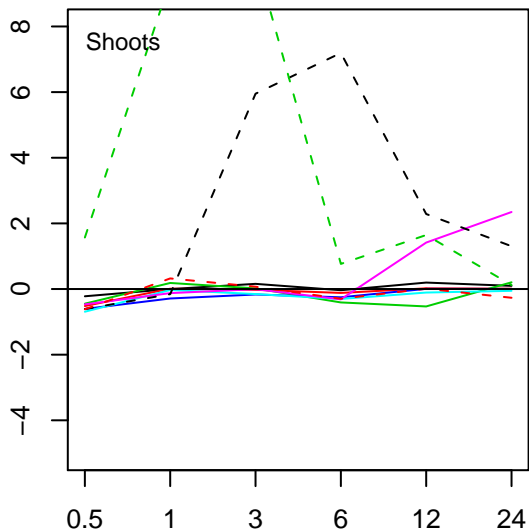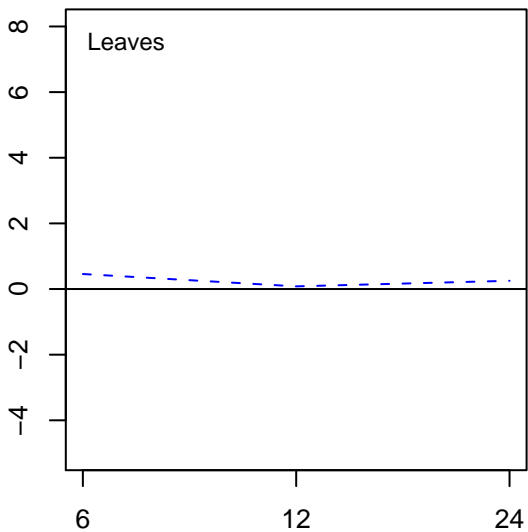

AtHsp23.6-M

- cold
- osmotic
- salt
- drought
- genotoxic
- oxidative
- - - uv-b light
- - - wounding
- - - heat
- - - pathogen

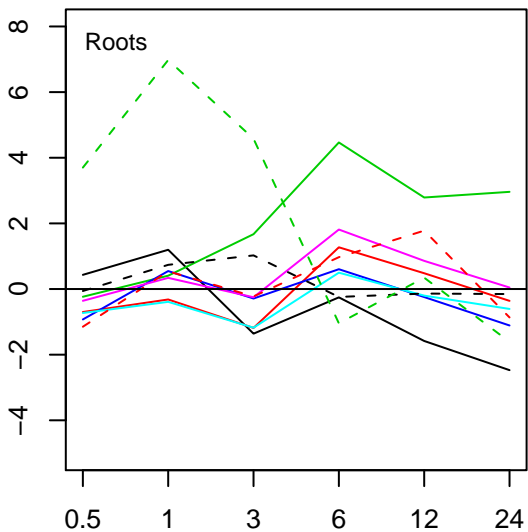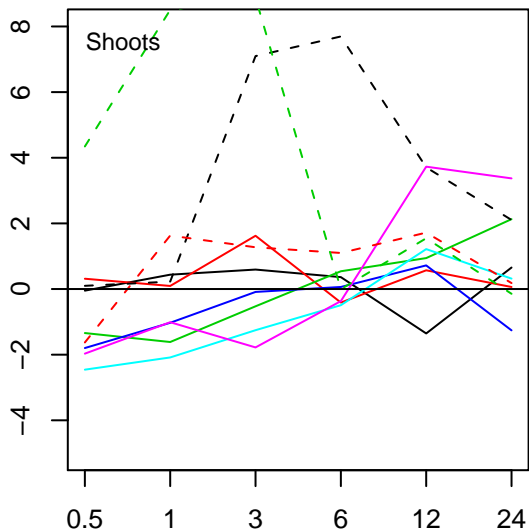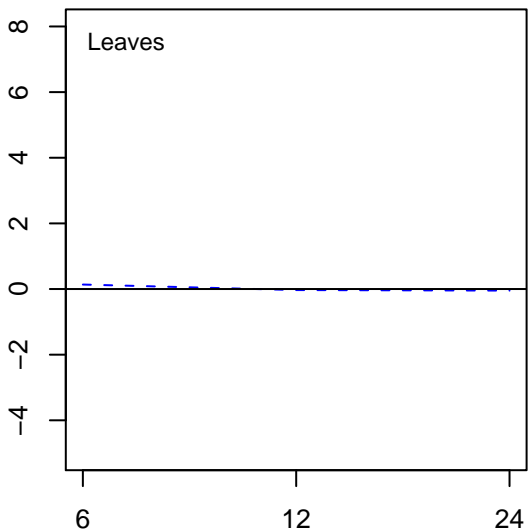

#### AtHsp23.5-M

- cold
- osmotic
- salt
- drought
- genotoxic
- oxidative
- - - uv-b light
- - - wounding
- - - heat
- - - pathogen

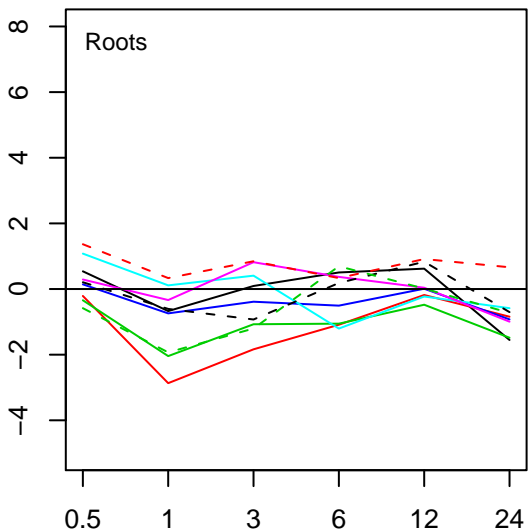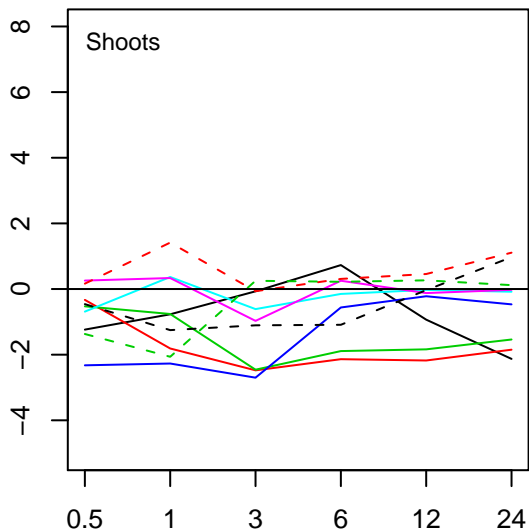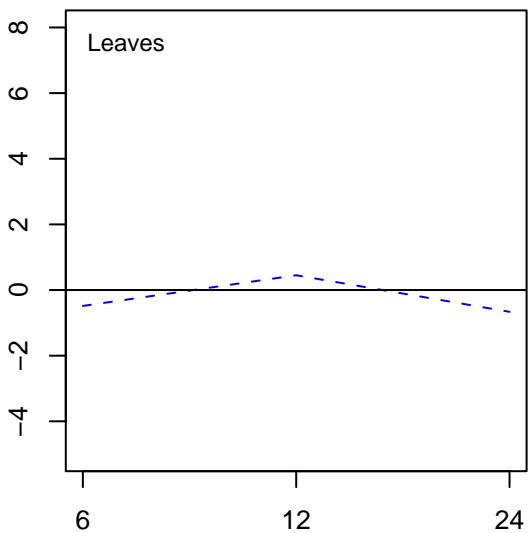

AtHsp15.4-CI(r)

- cold
- osmotic
- salt
- drought
- genotoxic
- oxidative
- - - uv-b light
- - - wounding
- - - heat
- - - pathogen

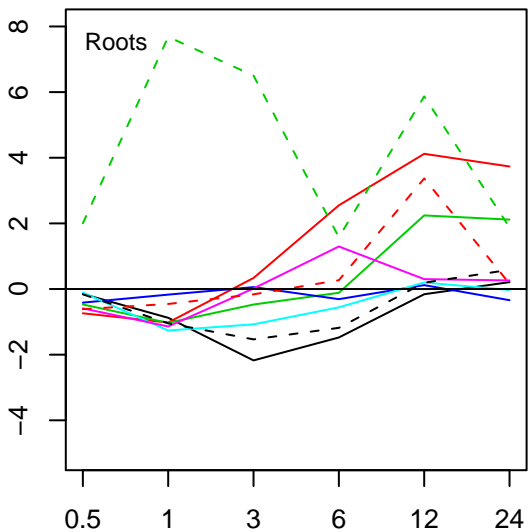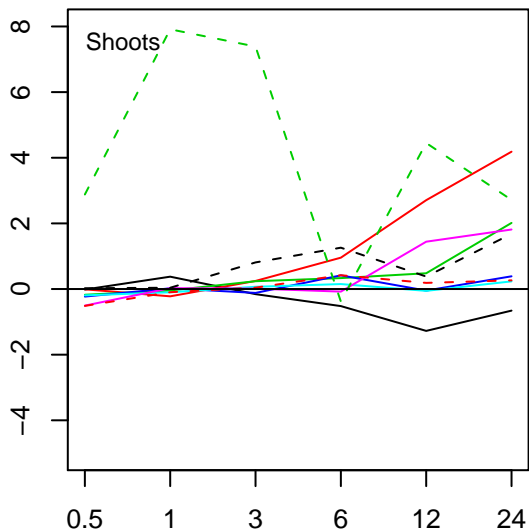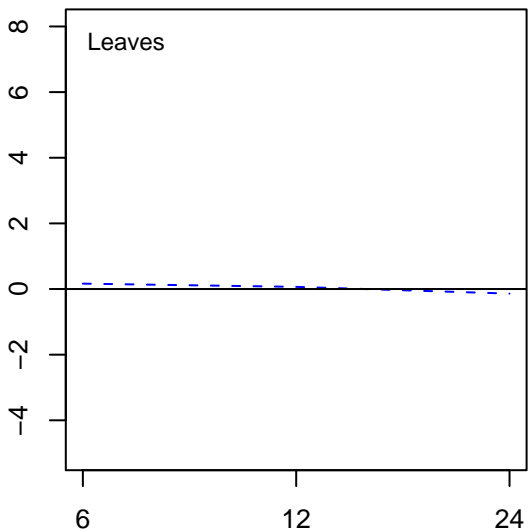

AtHsp15.7-Cl(r)

- cold
- osmotic
- salt
- drought
- genotoxic
- oxidative
- - - uv-b light
- - - wounding
- - - heat
- - - pathogen

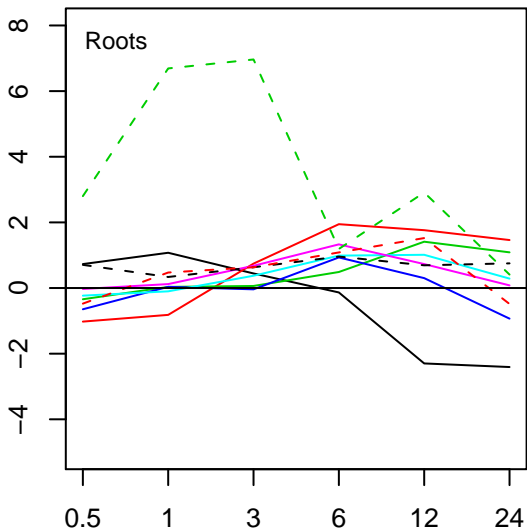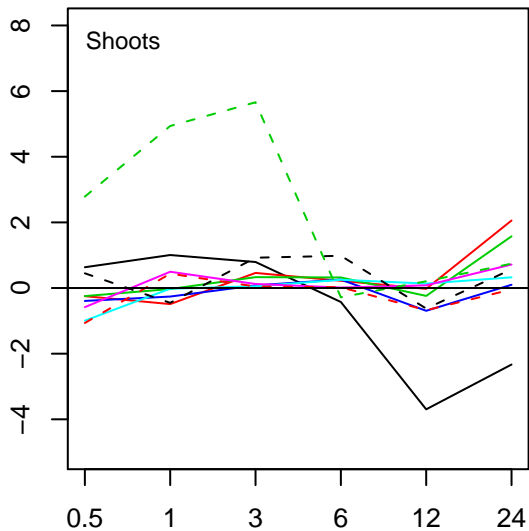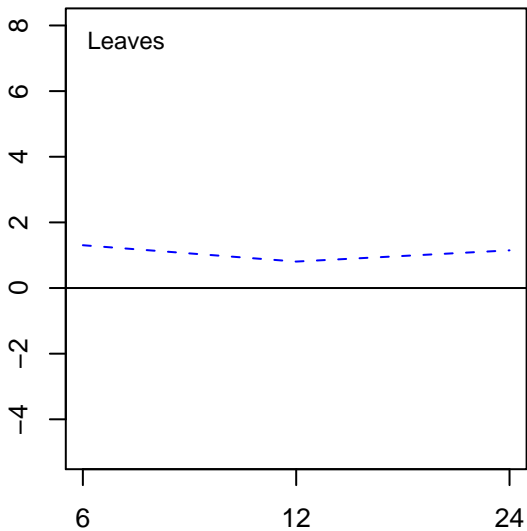

#### AtHsp18.5-Cl(r)

- cold
- osmotic
- salt
- drought
- genotoxic
- oxidative
- - - uv-b light
- - - wounding
- - - heat
- - - pathogen

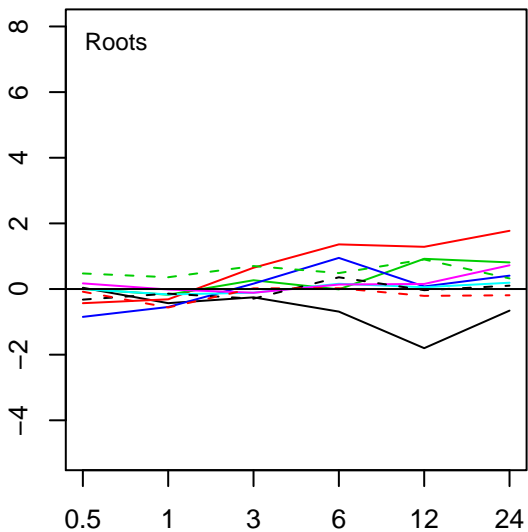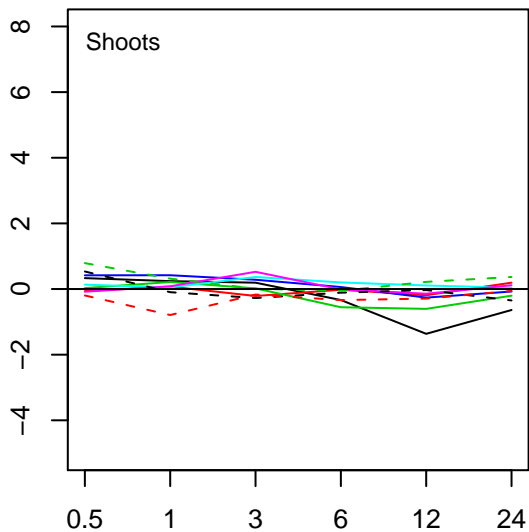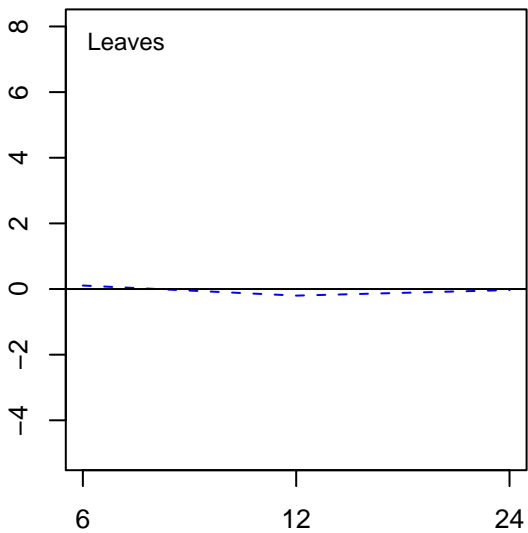

AtHsp21.7-Cl(r)

- cold
- osmotic
- salt
- drought
- genotoxic
- oxidative
- - - uv-b light
- - - wounding
- - - heat
- - - pathogen

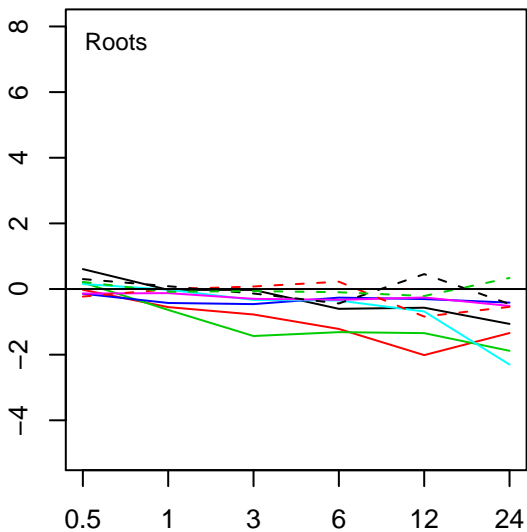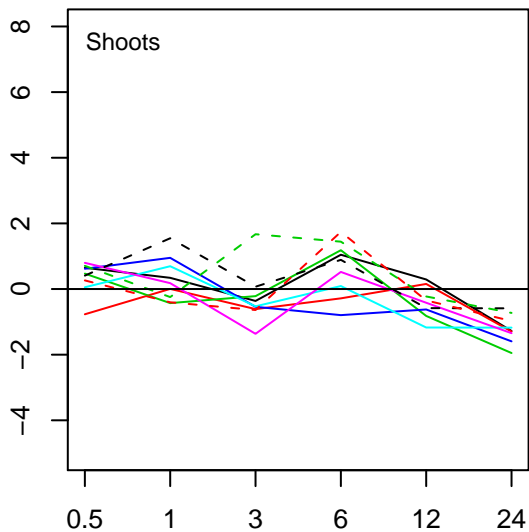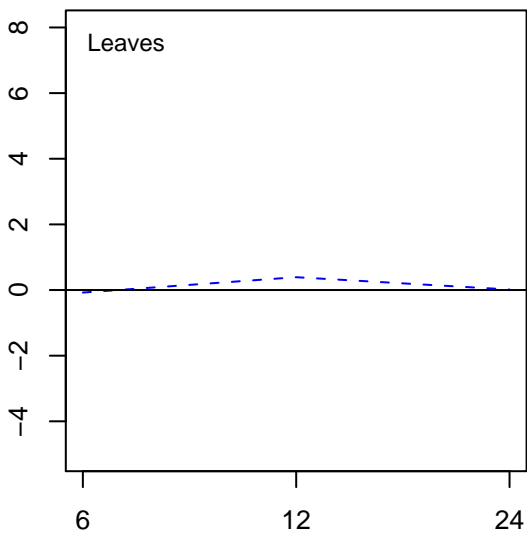

AtHsp14.2-P(r)

- cold
- osmotic
- salt
- drought
- genotoxic
- oxidative
- - - uv-b light
- - - wounding
- - - heat
- - - pathogen

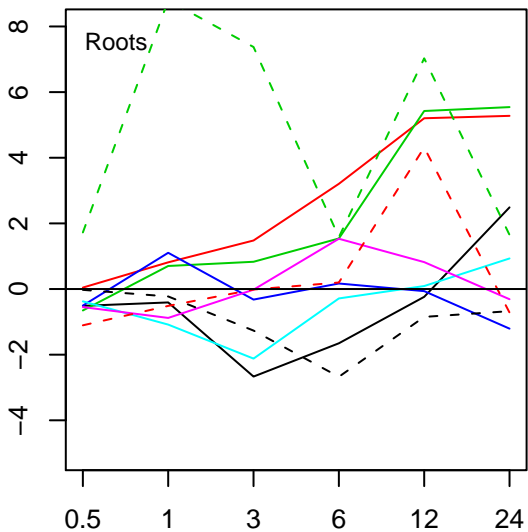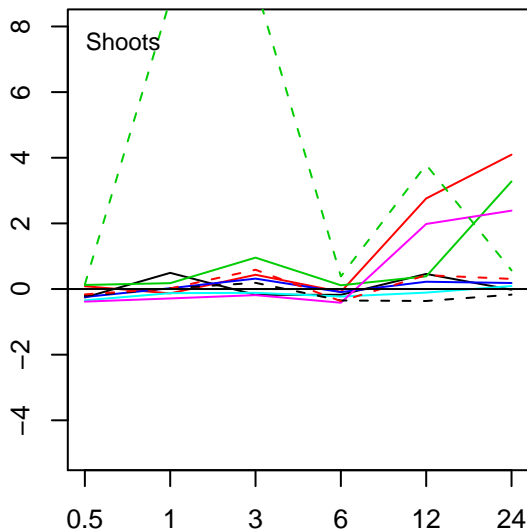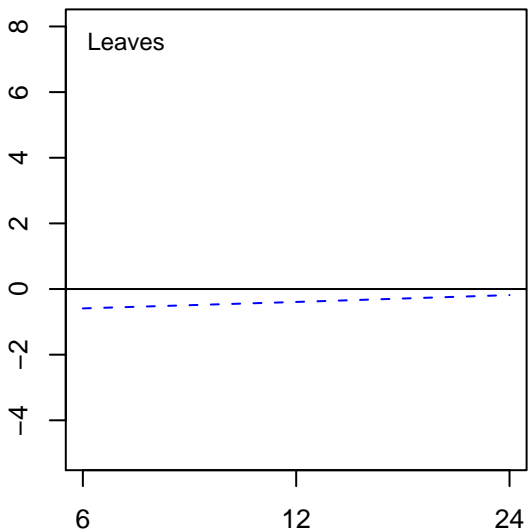

AtHsp26.5-P(r)

- cold
- osmotic
- salt
- drought
- genotoxic
- oxidative
- - - uv-b light
- - - wounding
- - - heat
- - - pathogen



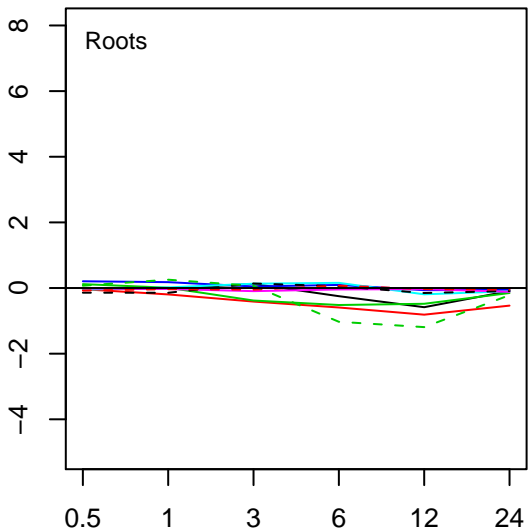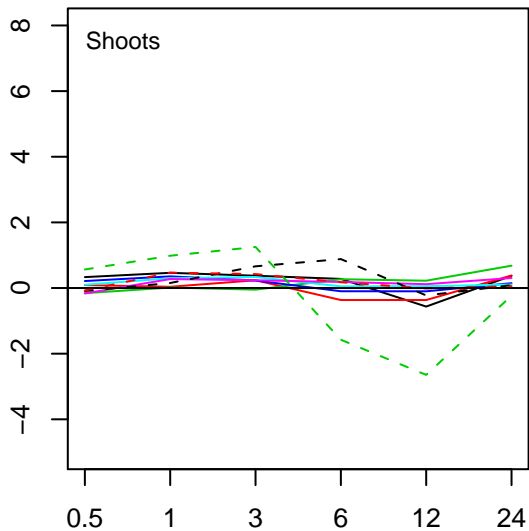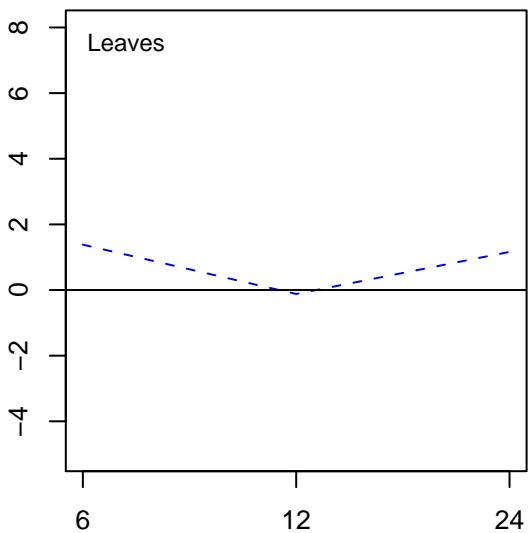

- AtHsp70-1
- cold
  - osmotic
  - salt
  - drought
  - genotoxic
  - oxidative
  - - - uv-b light
  - - - wounding
  - - - heat
  - - - pathogen

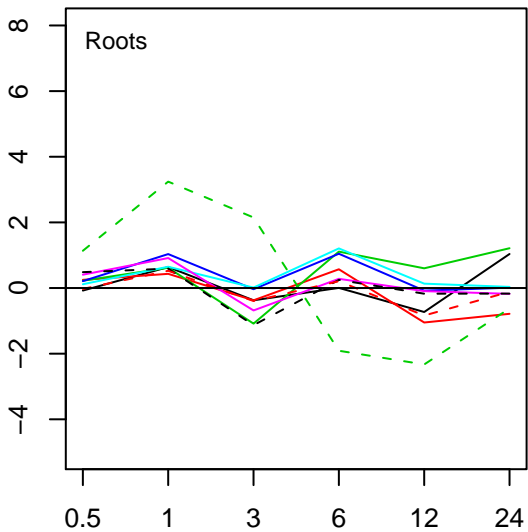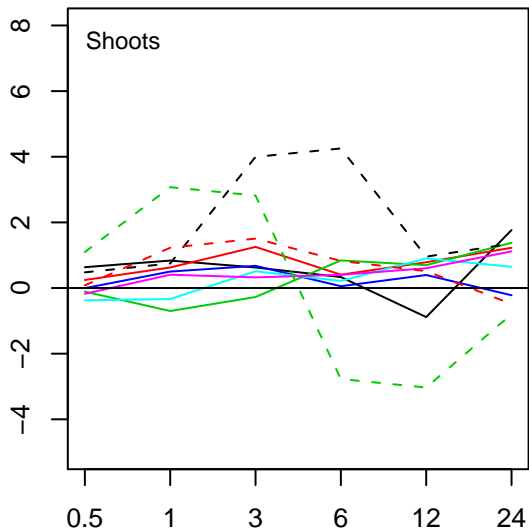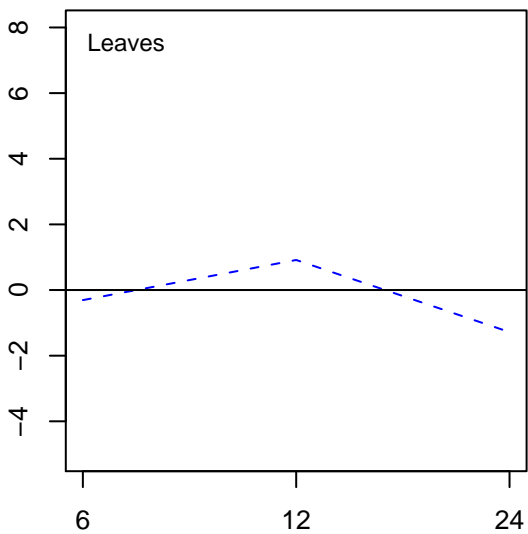

- AtHsp70-2
- cold
  - osmotic
  - salt
  - drought
  - genotoxic
  - oxidative
  - - - uv-b light
  - - - wounding
  - - - heat
  - - - pathogen

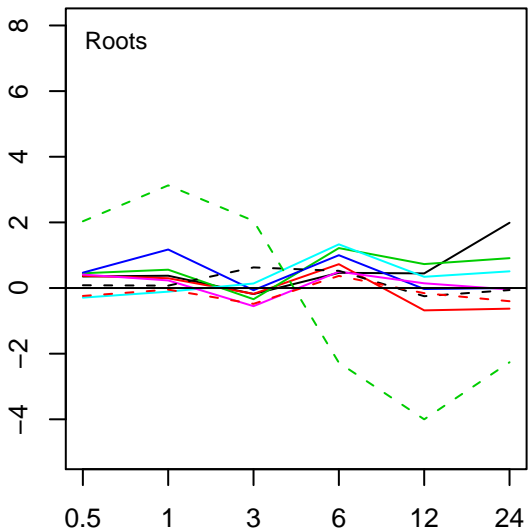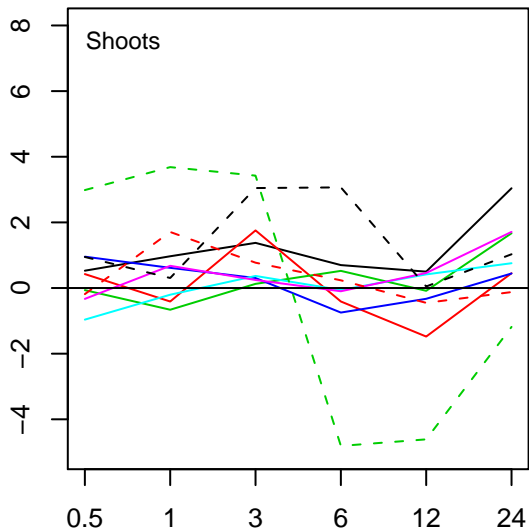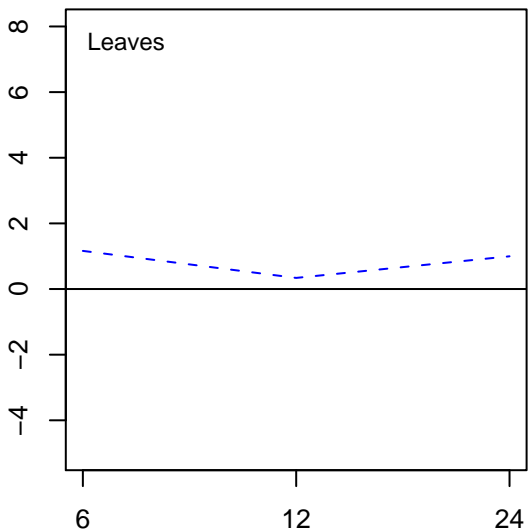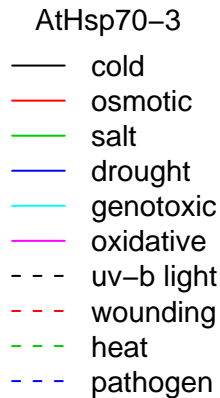

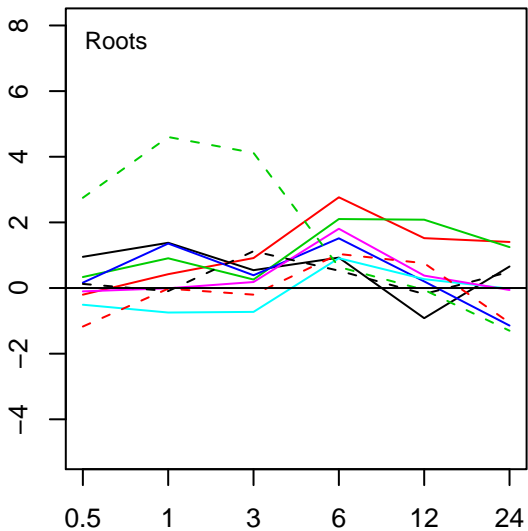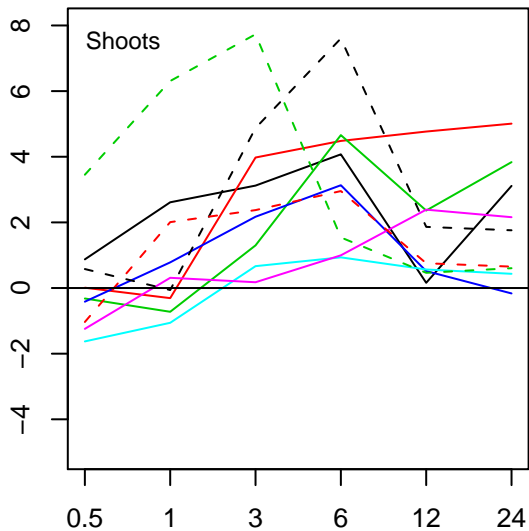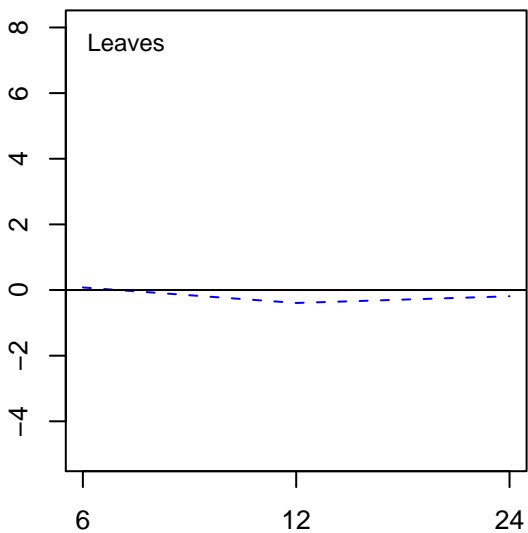

- AtHsp70-4
- cold
  - osmotic
  - salt
  - drought
  - genotoxic
  - oxidative
  - - - uv-b light
  - - - wounding
  - - - heat
  - - - pathogen

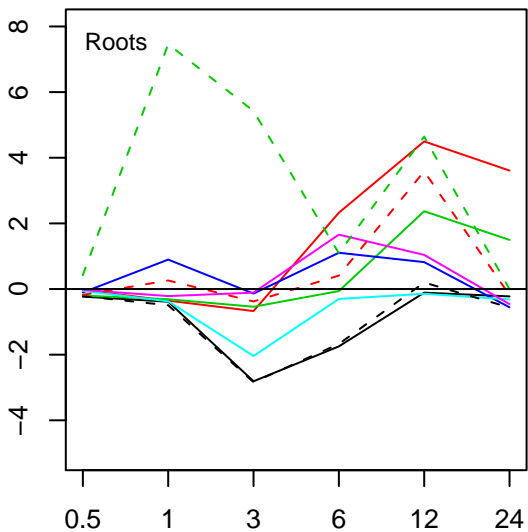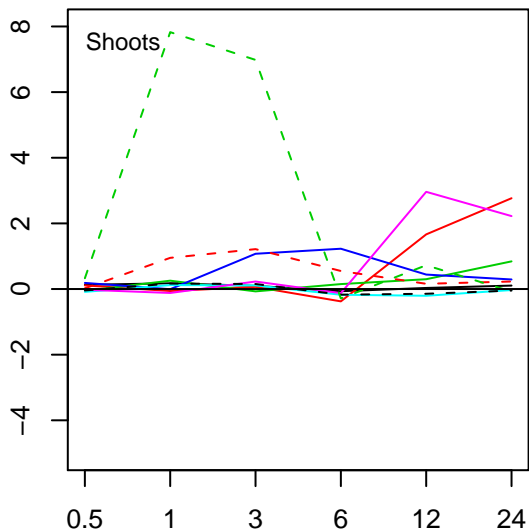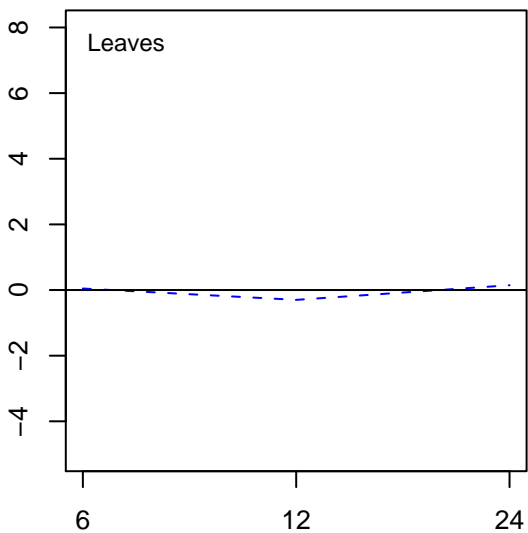

### AtHsp70-5

- cold
- osmotic
- salt
- drought
- genotoxic
- oxidative
- - - uv-b light
- - - wounding
- - - heat
- - - pathogen

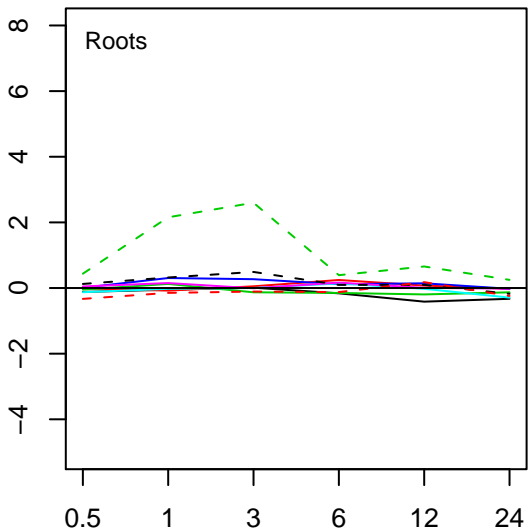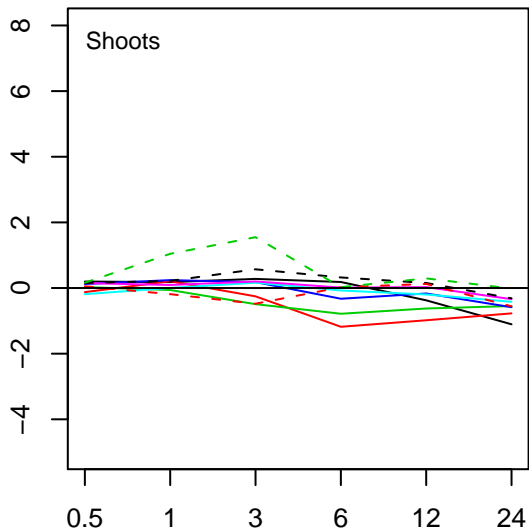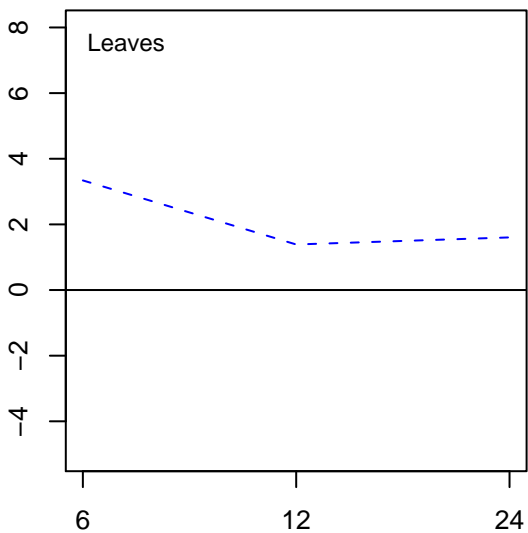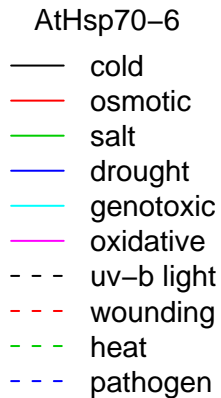

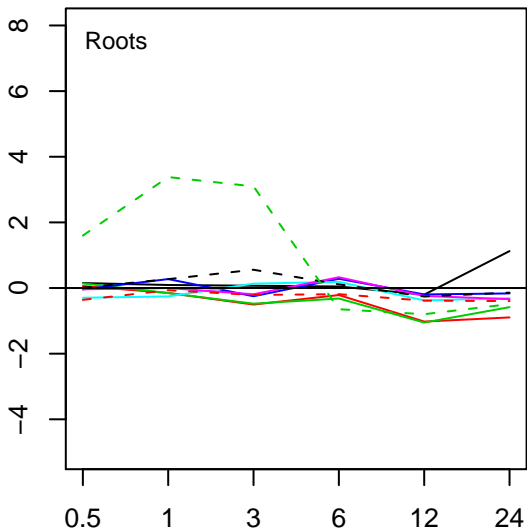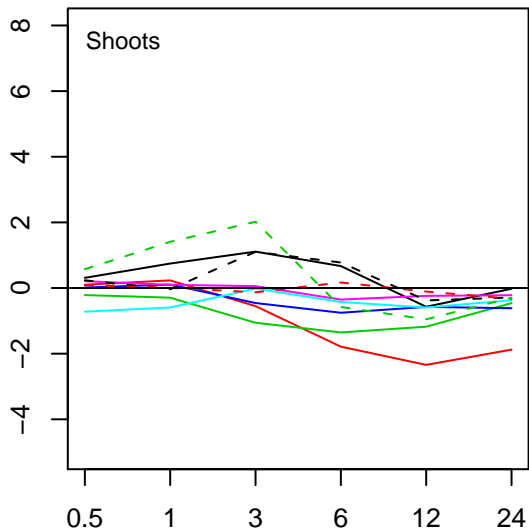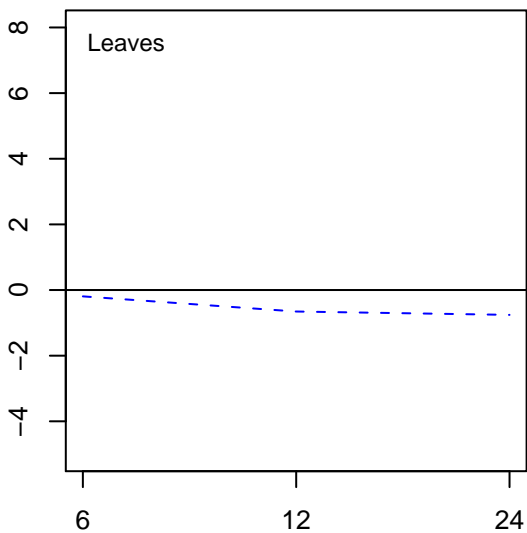

- AtHsp70-7
- cold
  - osmotic
  - salt
  - drought
  - genotoxic
  - oxidative
  - - - uv-b light
  - - - wounding
  - - - heat
  - - - pathogen

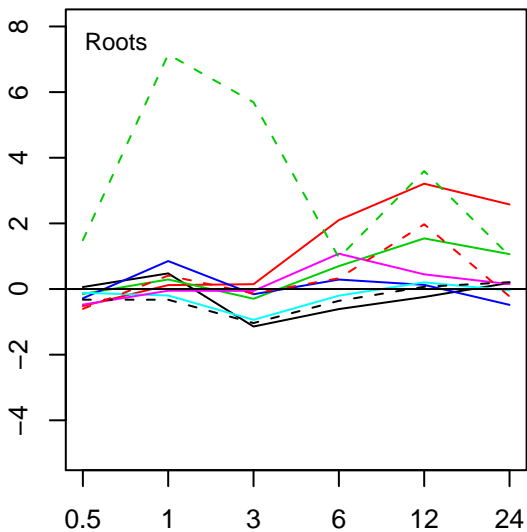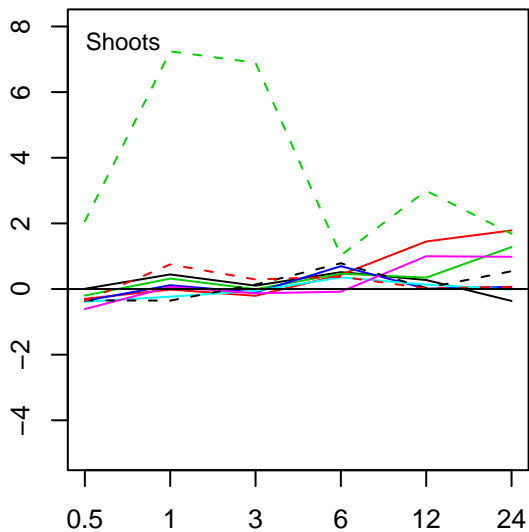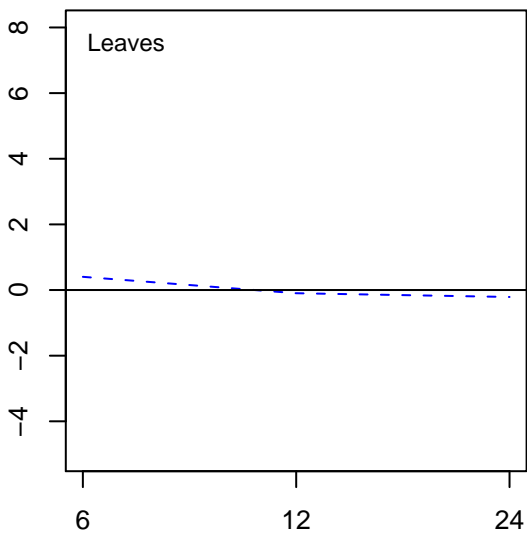

#### AtHsp70-8

- cold
- osmotic
- salt
- drought
- genotoxic
- oxidative
- - - uv-b light
- - - wounding
- - - heat
- - - pathogen



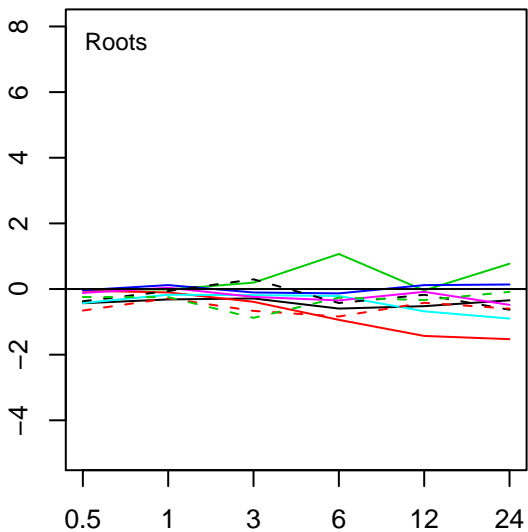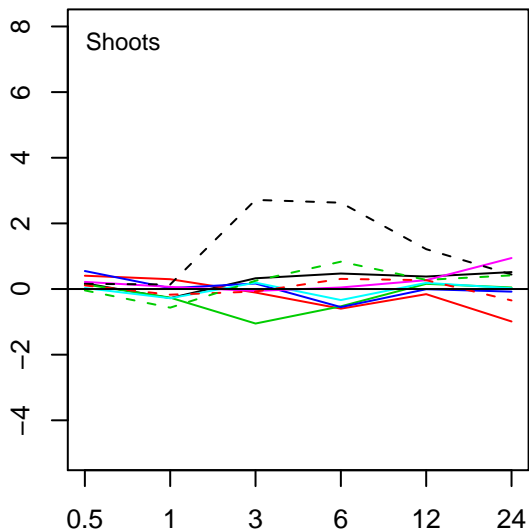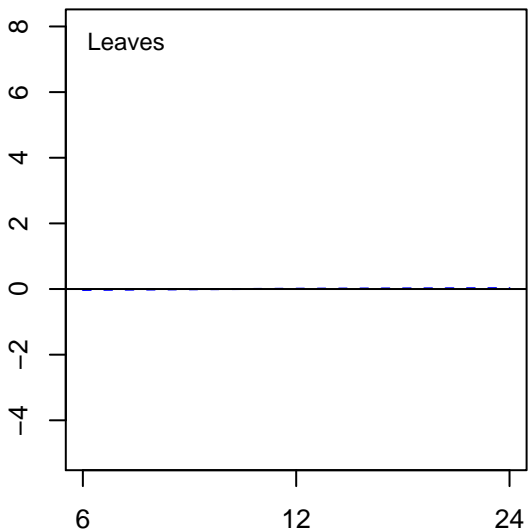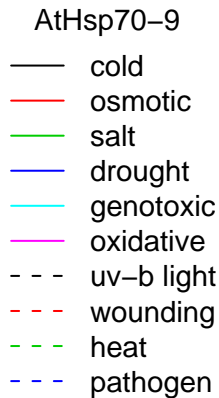

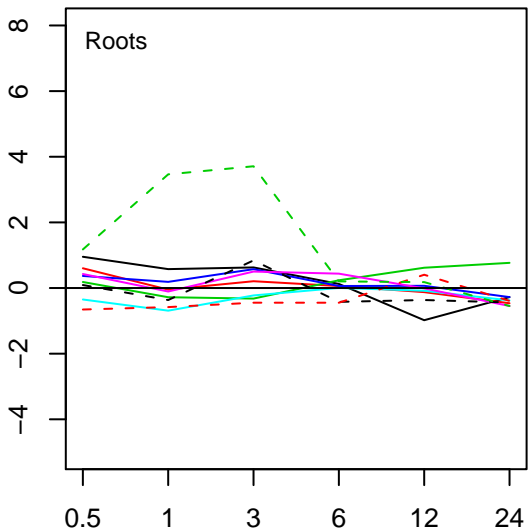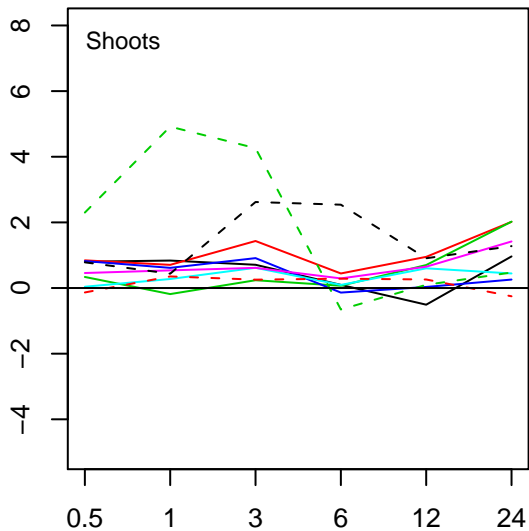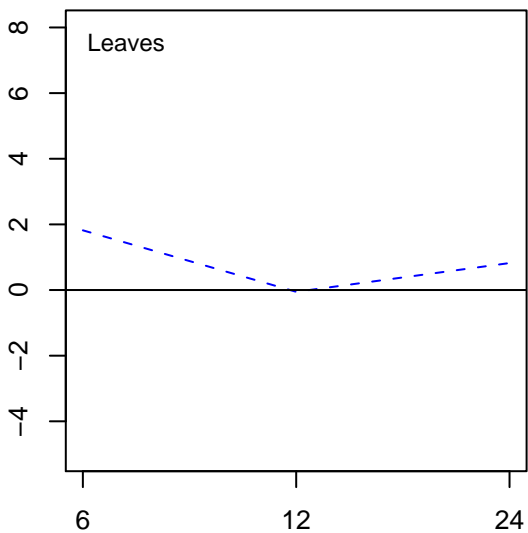

- AtHsp70-10
- cold
  - osmotic
  - salt
  - drought
  - genotoxic
  - oxidative
  - - - uv-b light
  - - - wounding
  - - - heat
  - - - pathogen

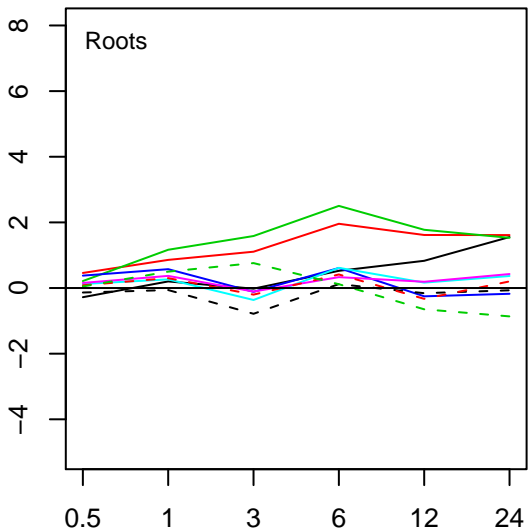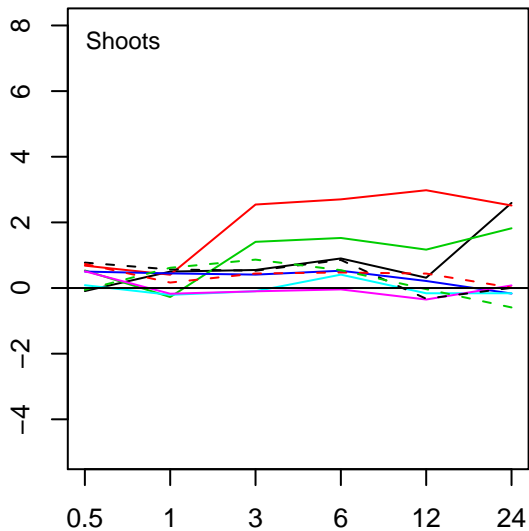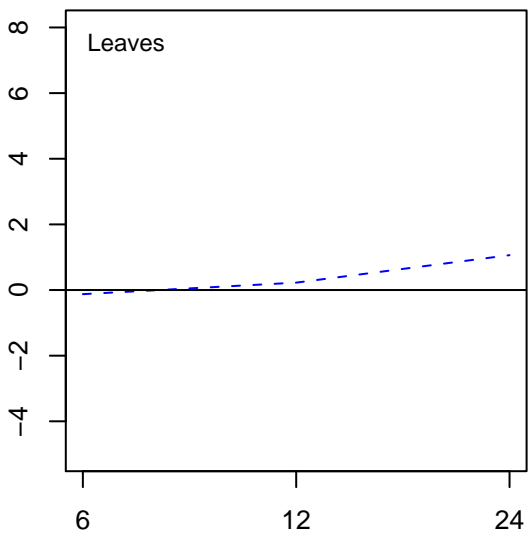

- AtHsp70-11
- cold
  - osmotic
  - salt
  - drought
  - genotoxic
  - oxidative
  - - - uv-b light
  - - - wounding
  - - - heat
  - - - pathogen

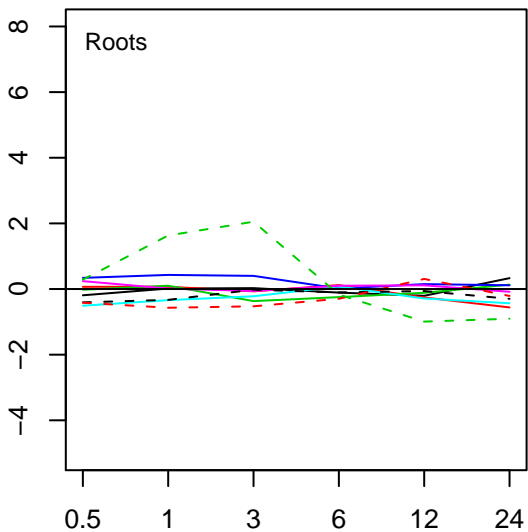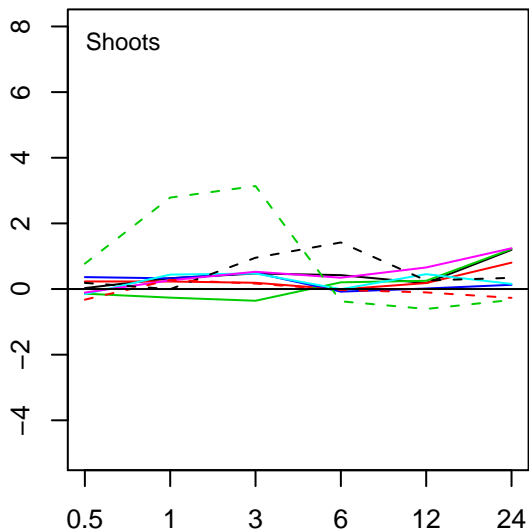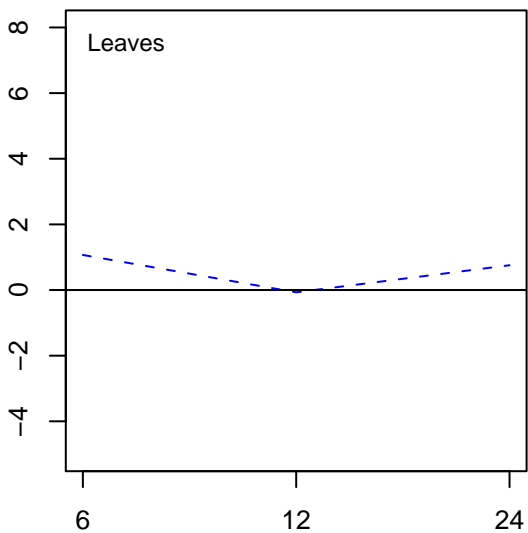

- AtHsp70-15
- cold
  - osmotic
  - salt
  - drought
  - genotoxic
  - oxidative
  - - - uv-b light
  - - - wounding
  - - - heat
  - - - pathogen

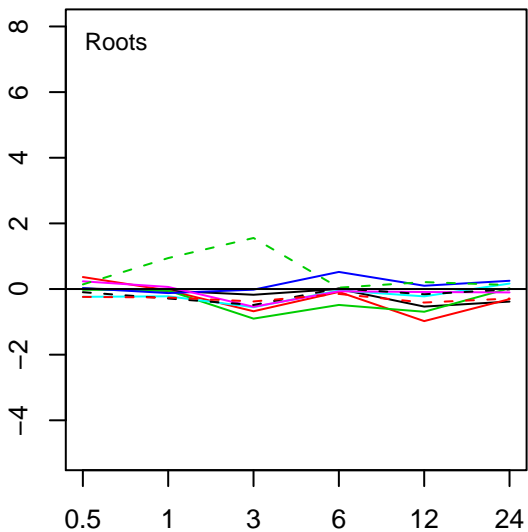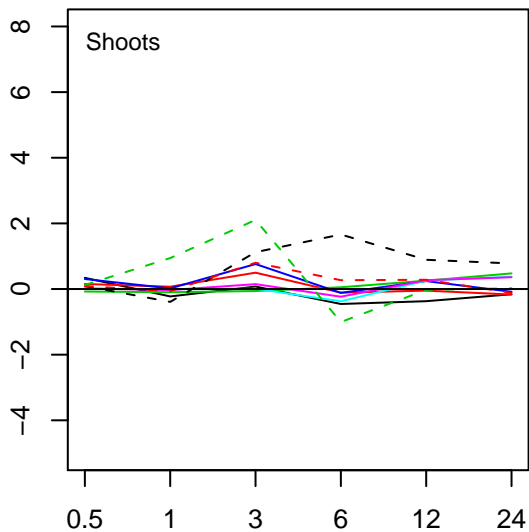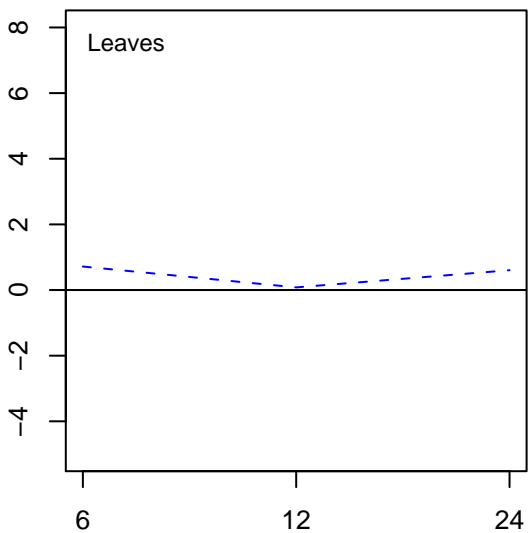

- AtHsp70-17**
- cold
  - osmotic
  - salt
  - drought
  - genotoxic
  - oxidative
  - - - uv-b light
  - - - wounding
  - - - heat
  - - - pathogen

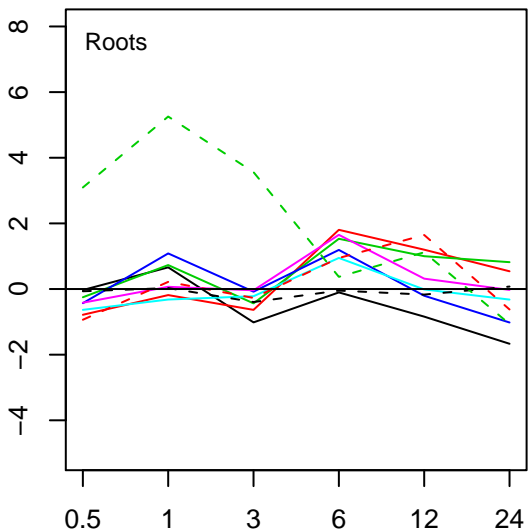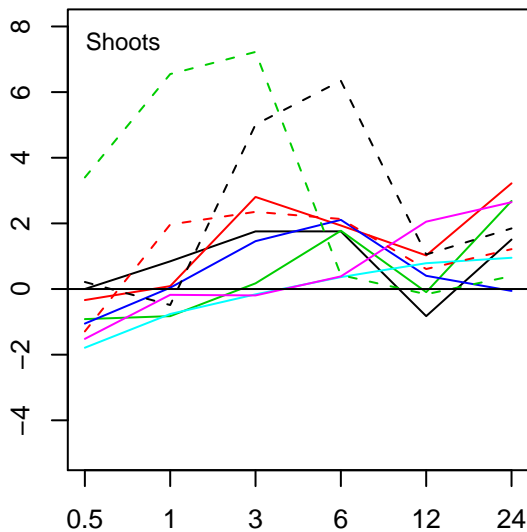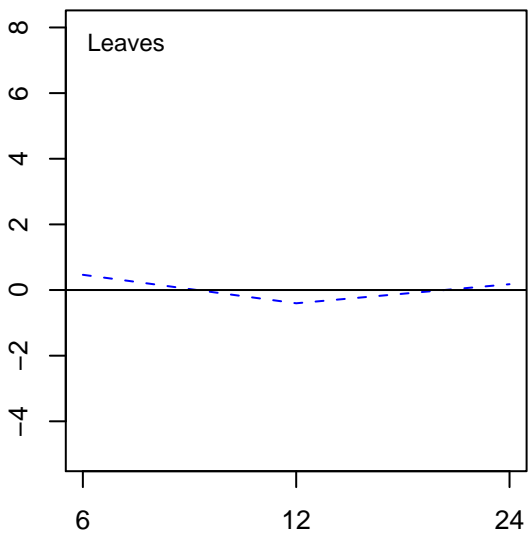

#### AtHsp90-1

- cold
- osmotic
- salt
- drought
- genotoxic
- oxidative
- - - uv-b light
- - - wounding
- - - heat
- - - pathogen

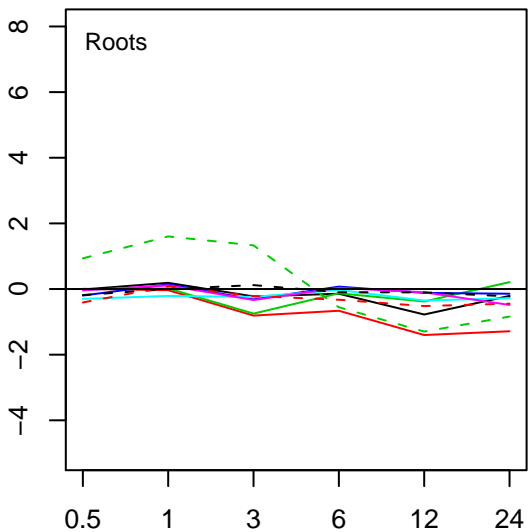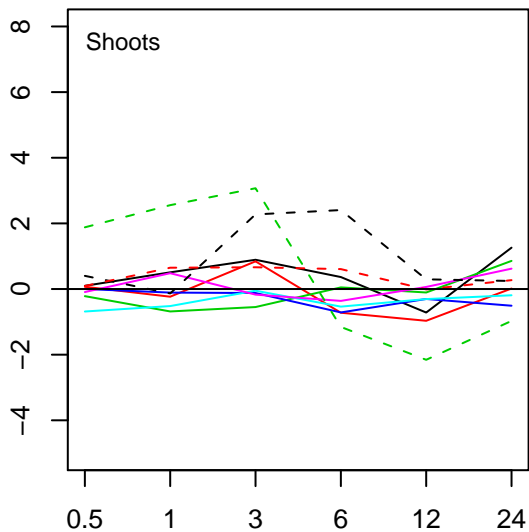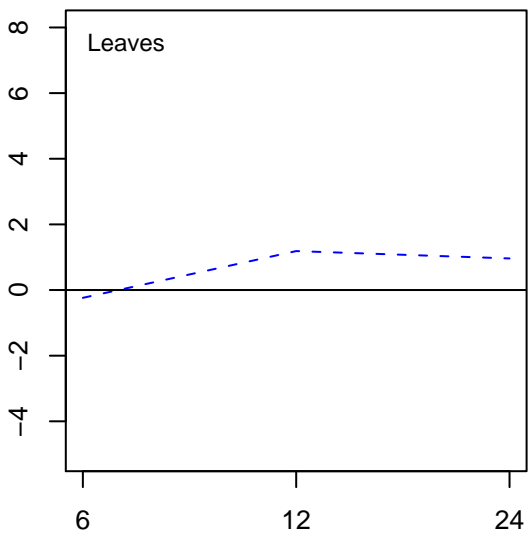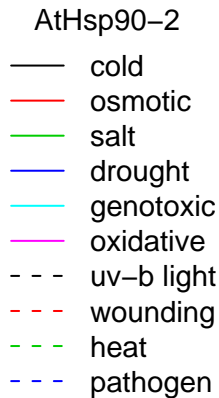

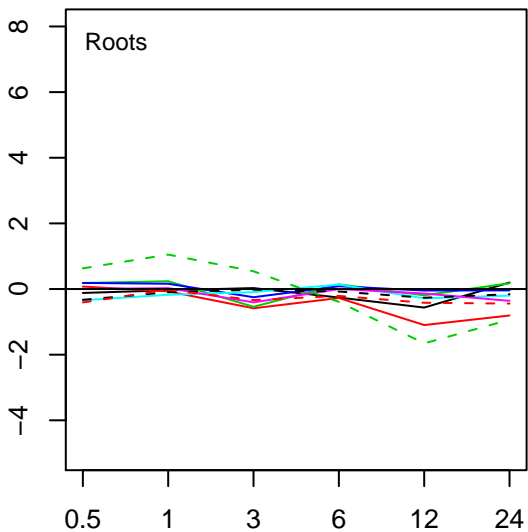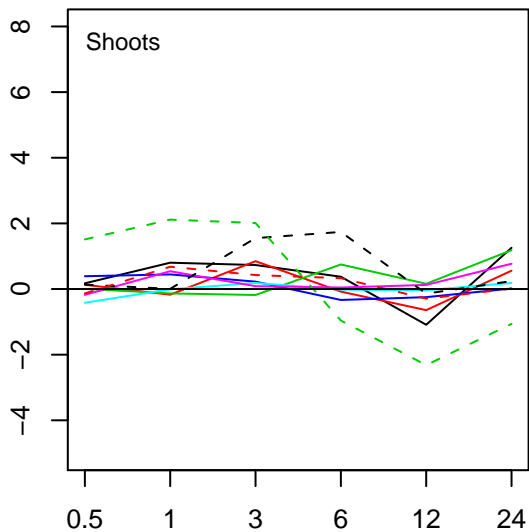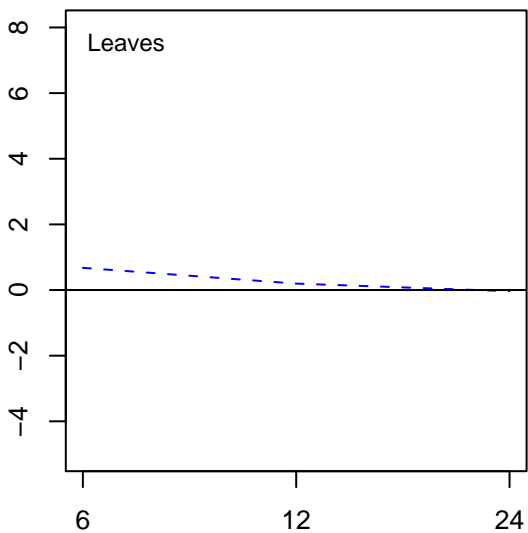

- AtHsp90-4
- cold
  - osmotic
  - salt
  - drought
  - genotoxic
  - oxidative
  - - - uv-b light
  - - - wounding
  - - - heat
  - - - pathogen



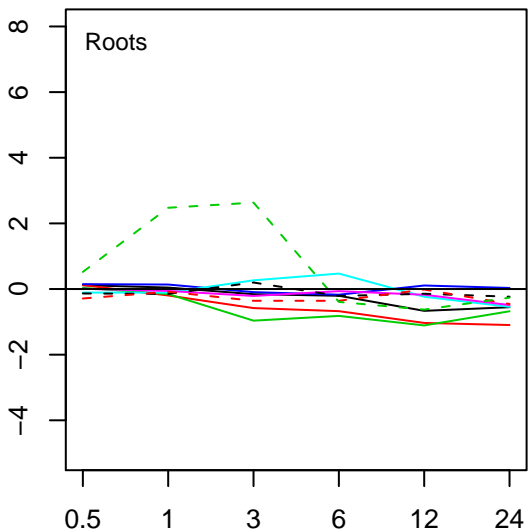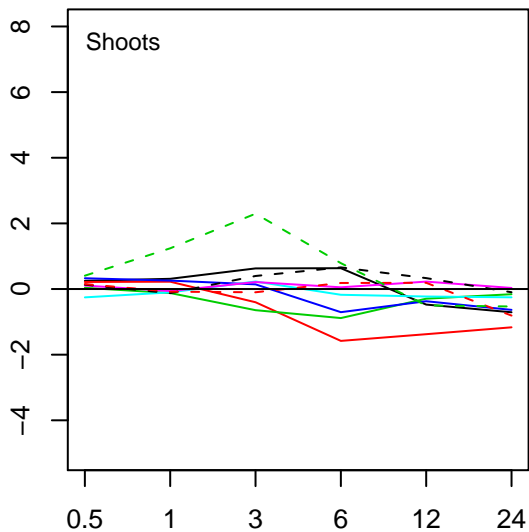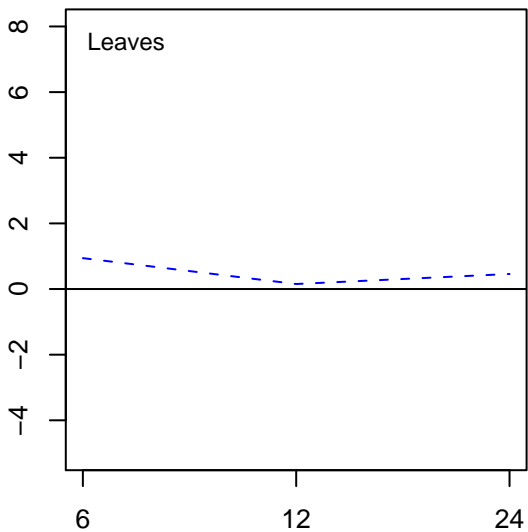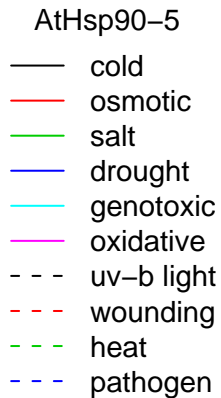

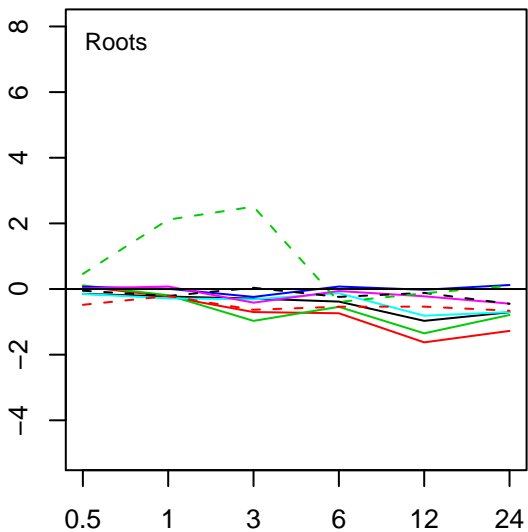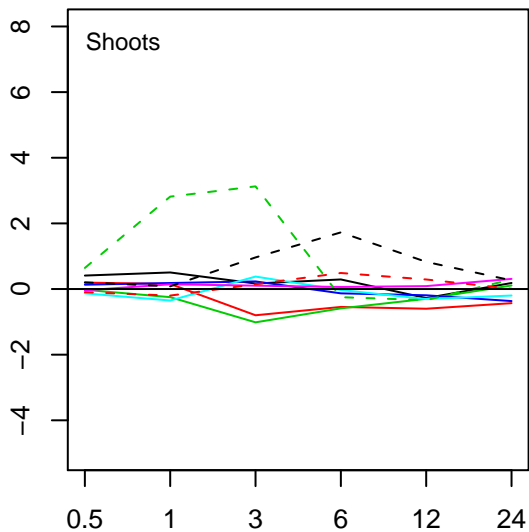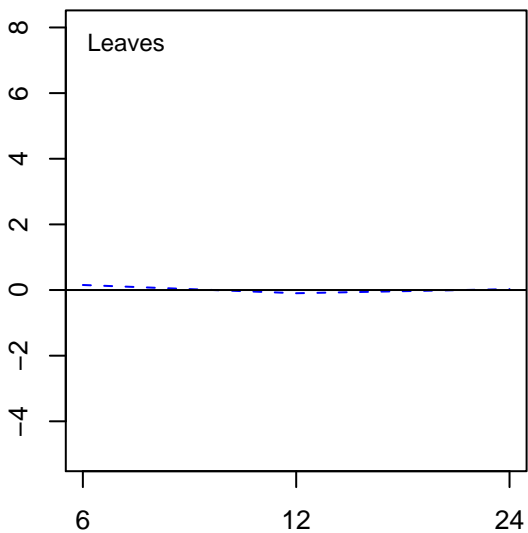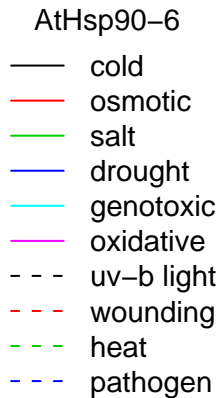

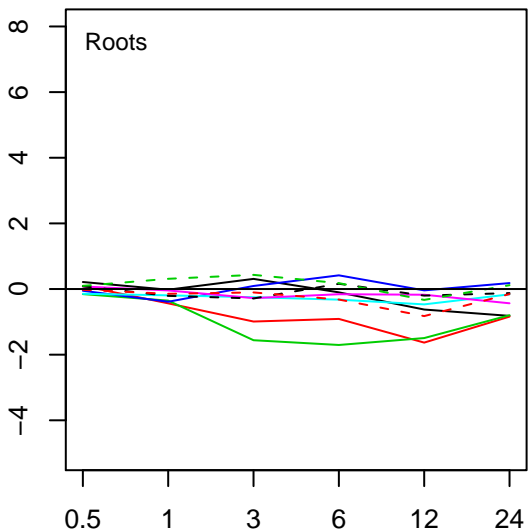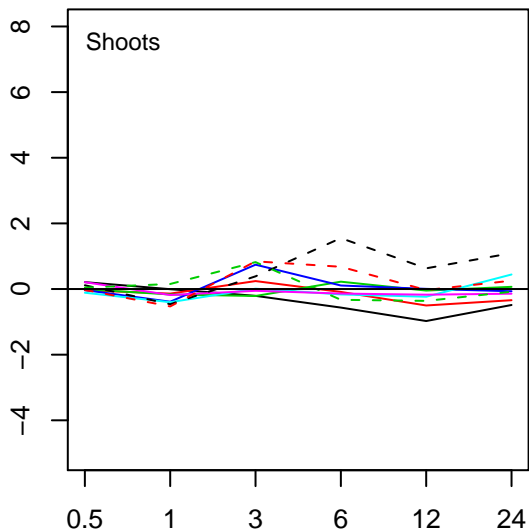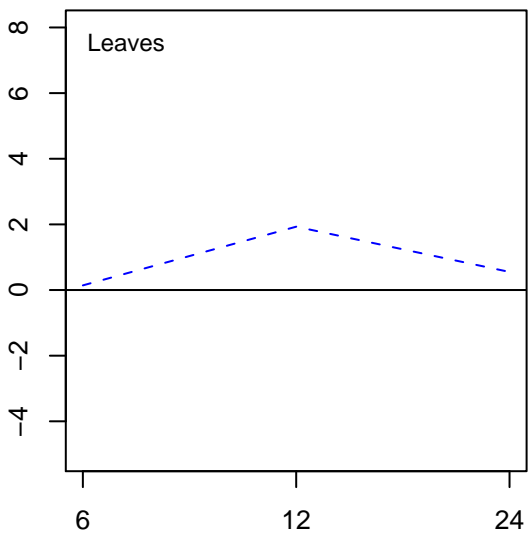

- AtHsp90-7
- cold
  - osmotic
  - salt
  - drought
  - genotoxic
  - oxidative
  - - - uv-b light
  - - - wounding
  - - - heat
  - - - pathogen

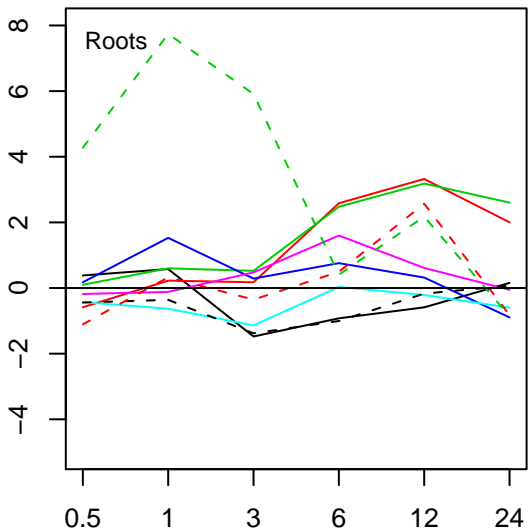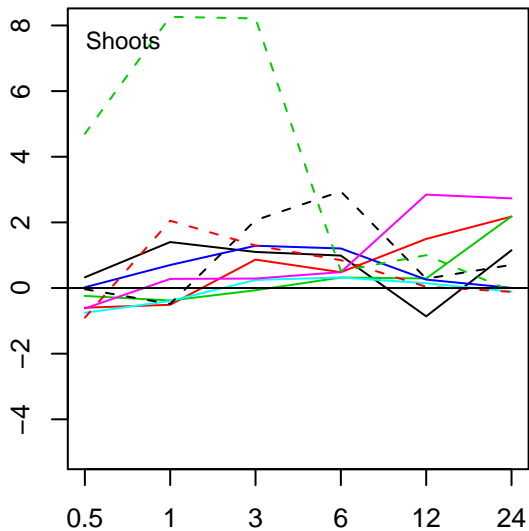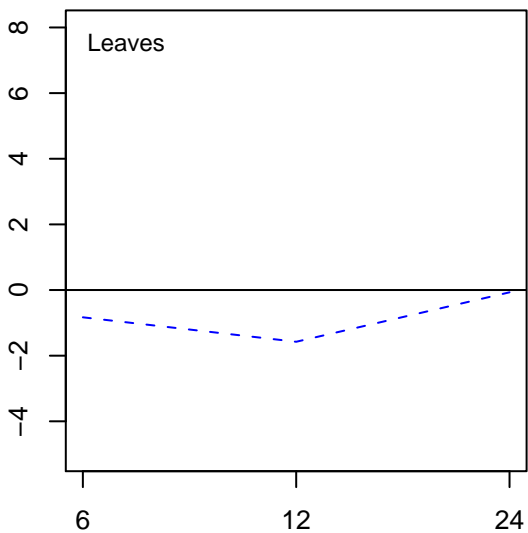

- AtHsp100-1**
- cold
  - osmotic
  - salt
  - drought
  - genotoxic
  - oxidative
  - - - uv-b light
  - - - wounding
  - - - heat
  - - - pathogen

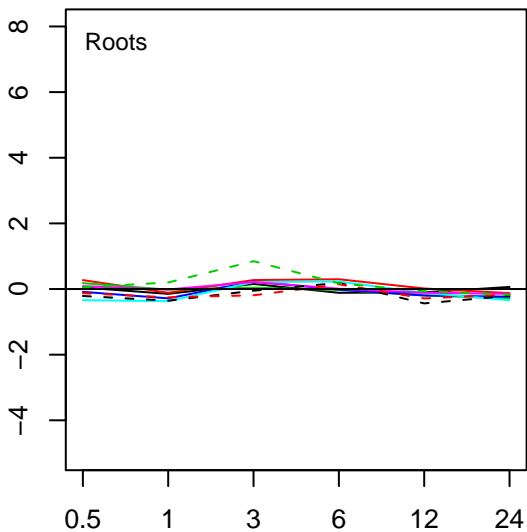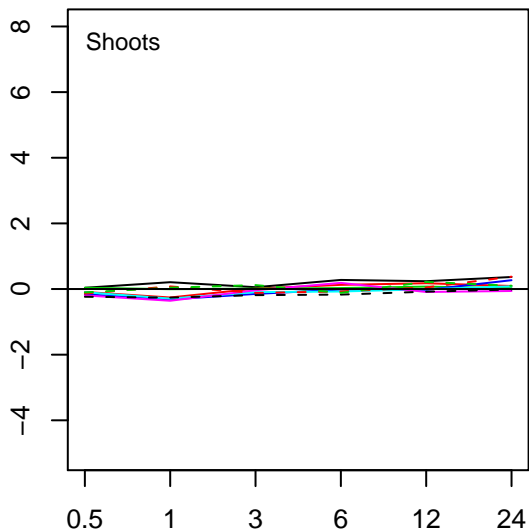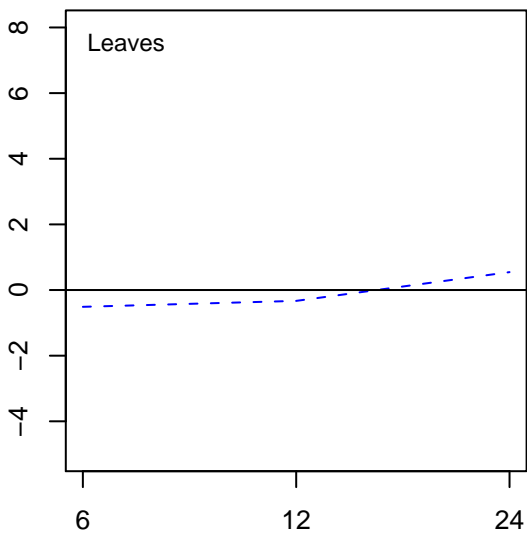

- AtHsp100-2
- cold
  - osmotic
  - salt
  - drought
  - genotoxic
  - oxidative
  - - - uv-b light
  - - - wounding
  - - - heat
  - - - pathogen

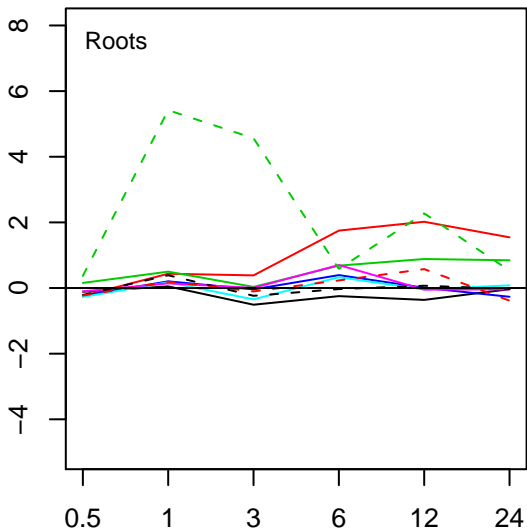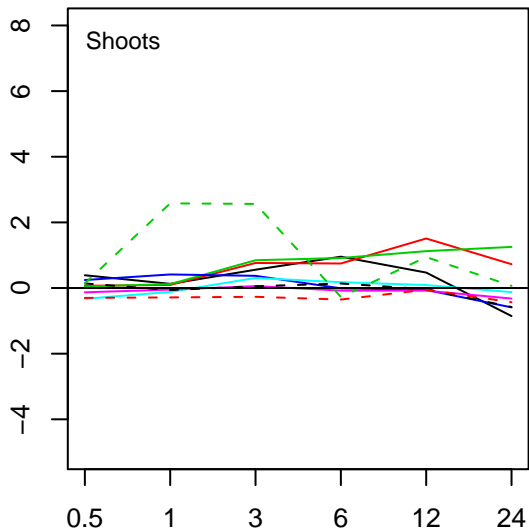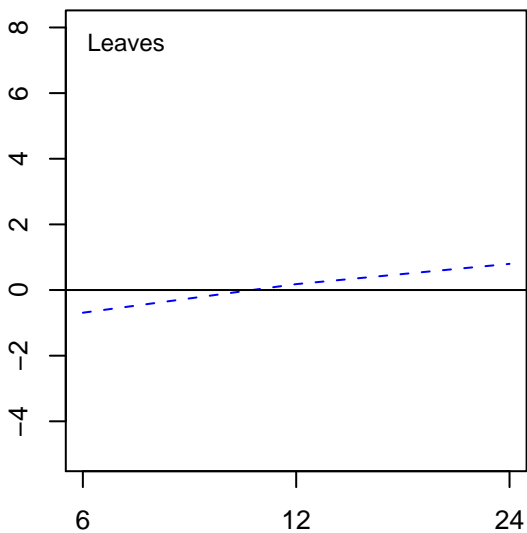

- AtHsp100-3
- cold
  - osmotic
  - salt
  - drought
  - genotoxic
  - oxidative
  - - - uv-b light
  - - - wounding
  - - - heat
  - - - pathogen

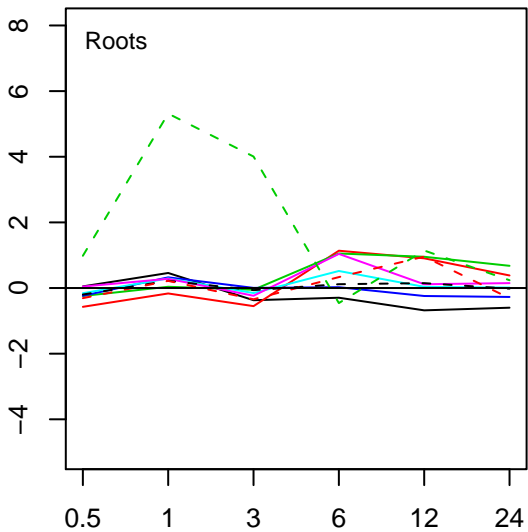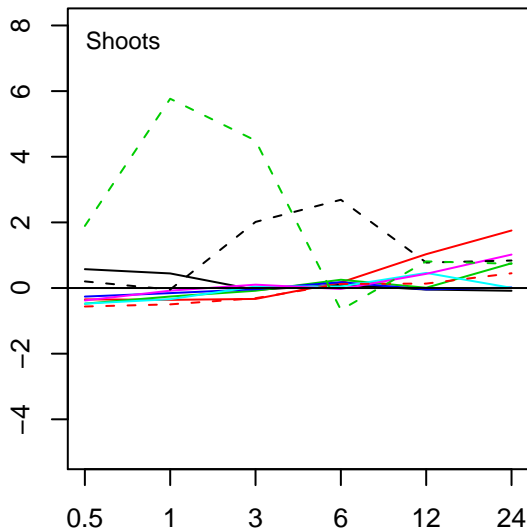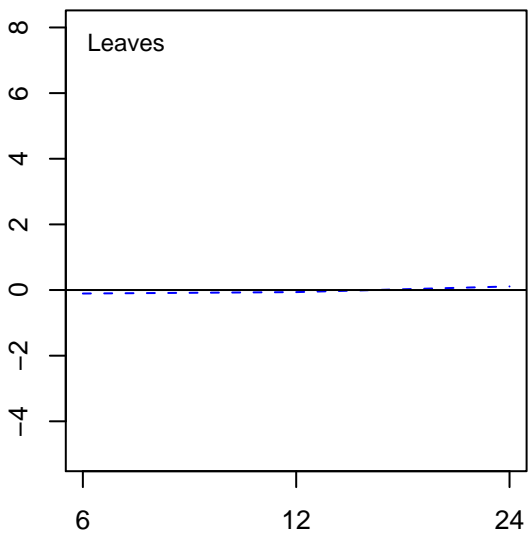

- AtHsp100-4
- cold
  - osmotic
  - salt
  - drought
  - genotoxic
  - oxidative
  - - - uv-b light
  - - - wounding
  - - - heat
  - - - pathogen

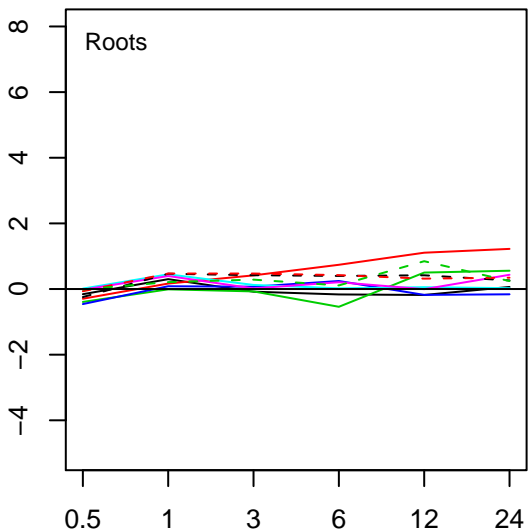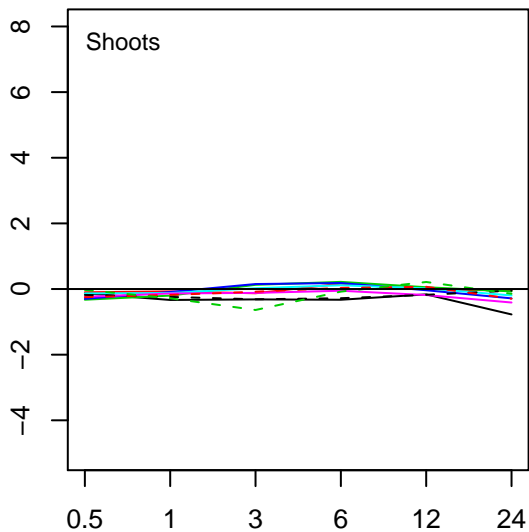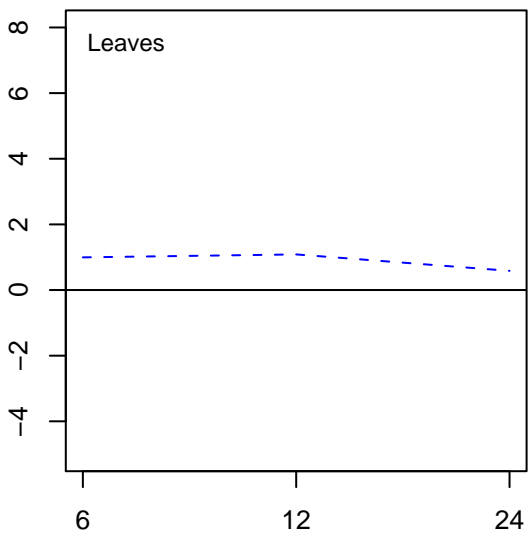

- AtHsp100-5
- cold
  - osmotic
  - salt
  - drought
  - genotoxic
  - oxidative
  - - - uv-b light
  - - - wounding
  - - - heat
  - - - pathogen



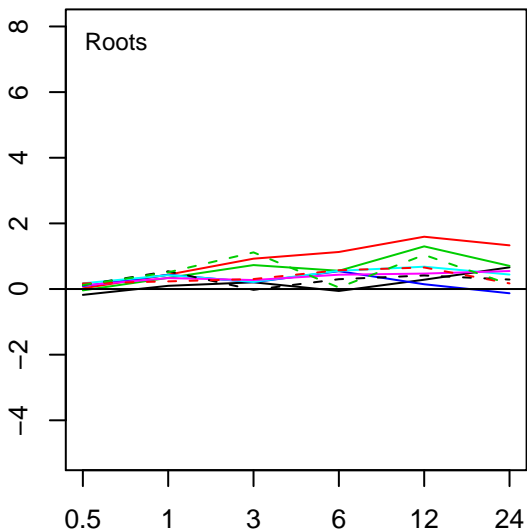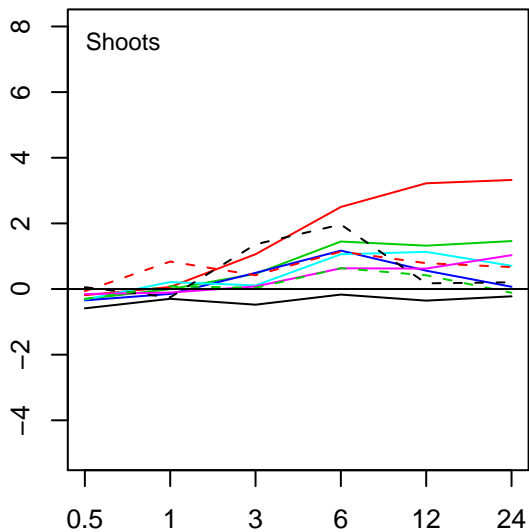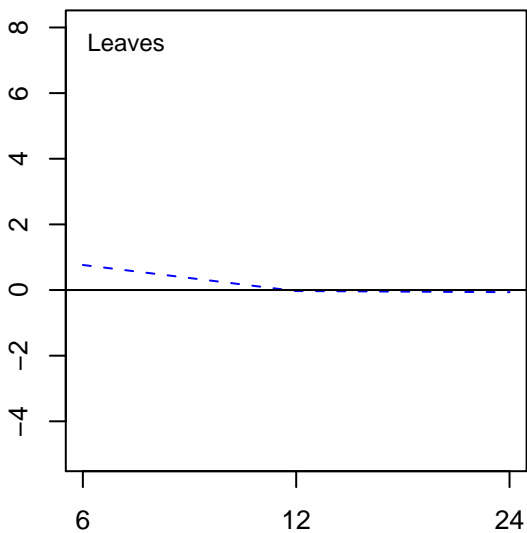

- AtHsp100-7
- cold
  - osmotic
  - salt
  - drought
  - genotoxic
  - oxidative
  - - - uv-b light
  - - - wounding
  - - - heat
  - - - pathogen

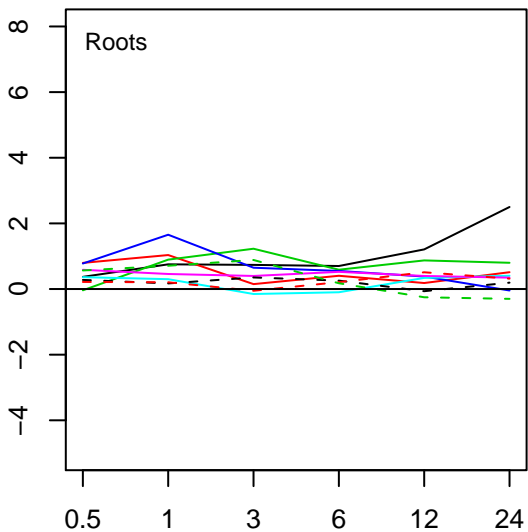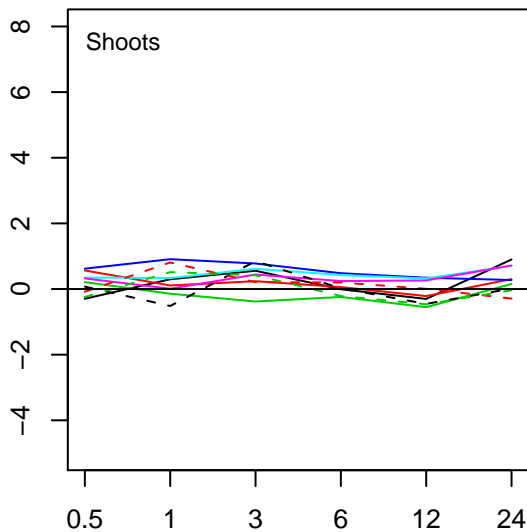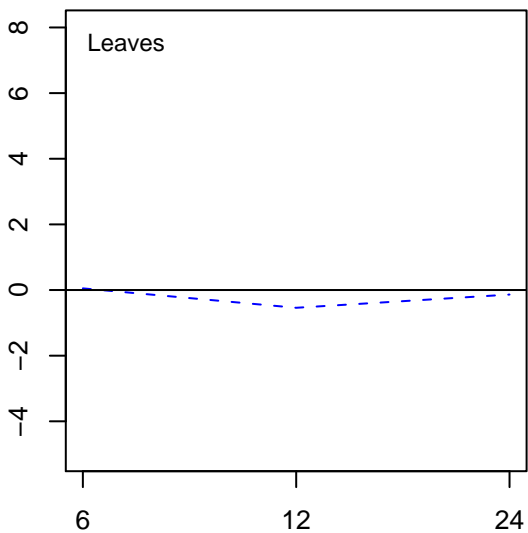

- AtHsp100-8
- cold
  - osmotic
  - salt
  - drought
  - genotoxic
  - oxidative
  - - - uv-b light
  - - - wounding
  - - - heat
  - - - pathogen
